# Supplementary material for: The association between SARS-CoV-2 infection and preterm delivery: a prospective study with a multivariable analysis
Source: BMC Pregnancy Childbirth. 2021 Apr 1;21:273. doi: 10.1186/s12884-021-03742-4 (PMC8016158; doi:10.1186/s12884-021-03742-4)
Supplement: Supplementary file 1 — Additional file 1 Registry Protocol. Table S1. List of variables in the Registry (Appendix 5 of Registry Protocol). [file 12884_2021_3742_MOESM1_ESM.zip]

Archive with 2 entries (2 files):
- Additional File 1R4.pdf
- Supplementary Table 1, Additional File 1R4.xlsx
