# Supplementary material for: The association between SARS-CoV-2 infection and preterm delivery: a prospective study with a multivariable analysis
Source: BMC Pregnancy Childbirth. 2021 Apr 1;21:273. doi: 10.1186/s12884-021-03742-4 (PMC8016158; doi:10.1186/s12884-021-03742-4)
Supplement: Supplementary file 1 — Additional file 1 Registry Protocol. Table S1. List of variables in the Registry (Appendix 5 of Registry Protocol). [file 12884_2021_3742_MOESM1_ESM.zip › Additional File 1R4.pdf]

**Additional File 1.** Registry Protocol

**Supplementary Table 1.** List of variables in the Registry (Appendix 5 of Registry Protocol)

## Table of Contents

|                                                                                                                                                                                                                                                                    |          |
|--------------------------------------------------------------------------------------------------------------------------------------------------------------------------------------------------------------------------------------------------------------------|----------|
| <b>Summary</b>                                                                                                                                                                                                                                                     | <b>3</b> |
| Study title                                                                                                                                                                                                                                                        | 3        |
| Protocol number and version                                                                                                                                                                                                                                        | 3        |
| Sponsors                                                                                                                                                                                                                                                           | 3        |
| Principal investigator of the registry                                                                                                                                                                                                                             | 3        |
| Funding                                                                                                                                                                                                                                                            | 3        |
| Abstract                                                                                                                                                                                                                                                           | 3        |
| <b>Study rationale and background</b>                                                                                                                                                                                                                              | <b>4</b> |
| Clinical course of SARS-CoV2 infection in pregnant women                                                                                                                                                                                                           | 4        |
| Vertical transmission                                                                                                                                                                                                                                              | 5        |
| Rationale                                                                                                                                                                                                                                                          | 5        |
| <b>Study hypothesis and objectives</b>                                                                                                                                                                                                                             | <b>5</b> |
| Hypothesis                                                                                                                                                                                                                                                         | 5        |
| Objectives                                                                                                                                                                                                                                                         | 5        |
| <b>Study design</b>                                                                                                                                                                                                                                                | <b>6</b> |
| <b>Definitions</b>                                                                                                                                                                                                                                                 | <b>6</b> |
| Definition of case and healthy patient for the study                                                                                                                                                                                                               | 6        |
| Definitions of symptomatic and asymptomatic patient                                                                                                                                                                                                                | 6        |
| <b>Study population and selection criteria</b>                                                                                                                                                                                                                     | <b>7</b> |
| <b><i>For the characterization of the clinical course of SARS-CoV-2 infection during pregnancy, the pre-study sample size calculation has not been carried out, as registry-based studies generally tend to be comprehensive without involving hypotheses.</i></b> | <b>7</b> |
| Exclusion criteria                                                                                                                                                                                                                                                 | 7        |
| <b>Overall sample size</b>                                                                                                                                                                                                                                         | <b>7</b> |
| <b>Data sources and work plan</b>                                                                                                                                                                                                                                  | <b>7</b> |
| Patient referral sources                                                                                                                                                                                                                                           | 7        |
| Data collection                                                                                                                                                                                                                                                    | 7        |
| Data quality assurance plan                                                                                                                                                                                                                                        | 8        |
| Heterogeneity tests                                                                                                                                                                                                                                                | 8        |
| <b>EXTRACTION OF DATA FROM THE REGISTRY: SUBSTUDIES</b>                                                                                                                                                                                                            | <b>9</b> |
| Substudy 1: Prospective observational study on delivery and vertical transmission to the new-born.                                                                                                                                                                 | 9        |
| Substudy 2: Prospective observational study on maternal and neonatal morbidity in pregnant women with COVID-19                                                                                                                                                     | 11       |
| Substudy 3. Cohort study on obstetric pathology.                                                                                                                                                                                                                   | 13       |

|                                                      |    |
|------------------------------------------------------|----|
| Substudy 4. Epidemiological prevalence study         | 15 |
| <i>Management and reporting of adverse reactions</i> | 17 |
| <i>Ethical aspects</i>                               | 17 |
| Informed consent                                     | 17 |
| Safety Measures and Confidentiality                  | 18 |
| Use of the data contained in the registry            | 18 |
| <i>References</i>                                    | 18 |

# Summary

## Study title

Spanish Registry of Pregnant Women with COVID-19

## Protocol number and version

Number 55/20. Version V8.

## Sponsors

This registry is a project promoted by Dr. Oscar Martínez Pérez of the Obstetrics and Gynaecology department of the Puerta de Hierro University Hospital.

## Principal investigator of the registry

National coordinator: Dr. Óscar Martínez Pérez. Obstetrics and Gynaecology Department. Puerta de Hierro University Hospital. Majadahonda.

Epidemiologist: Maria Luisa de la Cruz Conti

Researchers for each site: 100 sites from 32 Spanish provinces are included (Appendix 1)

## Funding

Neither the hospitals nor the participating investigators will receive any financial compensation for their collaboration. A bank account has been opened at the hospital's Biomedical Research Foundation to receive donations: COV20/00072 - SARS-CoV-2 and the COVID-19 disease Call financed by the Carlos III Institute of Health and co-financed with ERDF funds.

## Abstract

**Rationale:** Knowledge about the impact of the SARS-CoV-2 virus on pregnancy is still scarce and all current recommendations are based on less than 100 cases published in the literature. To identify moderate effects (such as vertical transmission, obstetric morbidity, foetal death, maternal or neonatal death) and to allow accurate risk estimates, larger sample sizes than those currently available are required.

**Methods:** Prospective observational study of pregnant women in whom SARS-CoV-2 infection is suspected at any time during pregnancy with positive test results for SARS-CoV-2, in order to create a registry of baseline characteristics of the pregnant woman, aspects related to the course of pregnancy and delivery, and related to the new-born, with an observation period of up to 14 days after delivery. Subsequently, several phased studies will be conducted to help establish and monitor the set of measures to improve the care of pregnant women.

**Discussion:** The national registry for COVID-19 in pregnancy described here is a tool for sharing and centralizing data related to exposures to SARS-CoV-2 during pregnancy in a structured way. It should speed up the process of prospectively obtaining a large unbiased data set and will collect information at national level.

## Study rationale and background

On 31st December 2019, the Wuhan Municipal Health Commission (Hubei Province, China) reported on a cluster of 27 pneumonia cases of unknown aetiology, with a common exposure to a seafood and live animal wholesale market in Wuhan City, including seven serious cases (1). The first case began on 8th December 2019 with fever, dry cough, dyspnoea, and radiological findings of bilateral pulmonary infiltrates. On 7th January 2020, Chinese authorities identified a new type of virus from the Coronaviridae family as the causative agent of the outbreak, which was subsequently named SARS-CoV-2, and whose genetic sequence was shared by the Chinese authorities on 12th January. The disease caused by this new virus has been called COVID-19 by international consensus (2).

### Clinical course of SARS-CoV2 infection in pregnant women

Pregnant women are known to experience immunological and physiological changes that can make them more susceptible to viral respiratory infections, including COVID-19. Several studies revealed that pregnant women with different viral respiratory diseases had a high risk of developing obstetric complications and adverse perinatal outcomes compared to non-pregnant women, due to changes in immune responses (3,4). We also know that pregnant women may be at risk of serious illness, morbidity, or mortality compared to the general population, as seen in other coronavirus infections.

Coagulation alterations have been described in people admitted to hospital for COVID-19 and, given that pregnancy confers a state of hypercoagulability, it is to be assumed that SARS-CoV2 infection in pregnant women may increase the risk of suffering from thromboembolic events, therefore, depending on the symptoms and other risk factors, they would require heparin prophylaxis (5,6). In Spain, there have been two deaths of patients with COVID-19 who had completed their pregnancies by Caesarean section, although it should be borne in mind that in both cases the Caesarean section was carried out due to severe maternal involvement (7). The causes of these deaths were related to coagulation abnormalities, in the first case due to pulmonary thromboembolism in a context of sepsis and in the second due to abruptio placentae with fulminant coagulopathy (8).

Regarding the period of gestation, no significant differences have been found between the course of the disease depending on the trimester of gestation, although most admissions for COVID-19 have occurred during the second and third trimesters (5,6,9). However, it has been shown that caesarean delivery is an independent risk factor that increases the chances of clinical worsening in pregnant women compared to vaginal delivery (7), both in asymptomatic pregnant women and in those with mild symptoms.

In China, several published studies show that in cases where the pregnant woman had pneumonia or a diagnosis of SARS-CoV-2, the delivery was often completed by caesarean section. The results of the Chinese series on 18 published cases show that 16 have resulted in caesarean section and two in vaginal deliveries. In these series, the patients showed symptoms of the disease (fever and cough) before, during and after delivery (10,11).

In the Chen H study, caesarean section was carried out between days 1 and 7 from the onset of symptoms (mean 3.3 days). One of these cases occurred after the caesarean section and in two cases a non-elective caesarean section was carried out at night (10).

In the study by Zhu H, of the 9 cases, 3 manifested in the postpartum, 2 intrapartum and 4 before delivery. In this series, two vaginal deliveries are published, with one of them being twins in a patient with symptoms (fever and cough) and the other one with symptoms starting in the postpartum period. Delivery occurred between 1 and 6 DAYS after admission (mean 3.5). Of those cases in which the symptoms occurred in the postpartum, between 1 and 3 days elapsed from delivery in this series. One case had a cough and two cases had fever (11).

Although the indications for caesarean sections are not clearly specified in the Chen H study (10), in the Zhu H study 5 were due to foetal *distress*, one case of previous uterine scar and an elective caesarean section due to maternal fever. The author suggests that maternal hypoxemia caused by infection triggers foetal hypoxia and preterm delivery. There are no data on the direct influence of COVID-19 on the intrauterine foetal status (11).

## Vertical transmission

The evidence of vertical transmission (before, during or after delivery by breastfeeding) in women who acquire the infection during the third trimester of pregnancy is scarce and intrauterine transmission of the virus has not yet been totally ruled out (12).

In the Chinese series, 16 out of the 18 pregnant women gave birth by caesarean section and, although the newborns did not show SARS-CoV-2 infection, perinatal infection can have adverse effects on newborns, such as loss of foetal well-being, premature birth, respiratory distress, thrombocytopenia along with impaired liver function and even death (10,11). In Chen H's study, the amniotic fluid (only 6 samples of the 9 caesarean sections), cord and placenta analysis was negative for COVID-19, but in this series there have been no normal deliveries with prolonged dilations or passage of the foetus through the birth canal (10).

Regarding the transmission of the virus through breastfeeding, there are still contradictory data regarding the presence of the virus in breast milk. However, in theory, breastfeeding is not contraindicated in women with COVID19 (13,14).

## Rationale

To date, few studies have described the impact of the SARS-CoV-2 virus on pregnancy, particularly infection occurring during the third trimester of pregnancy. The impact of the virus during the first and second trimesters of pregnancy remains unknown and must be urgently determined. All current recommendations are based on less than 50 cases published in the literature, with speculations on different aspects of management. To identify moderate effects (such as vertical transmission, foetal death, maternal or neonatal death), larger sample sizes than those currently available are required to allow accurate risk estimates. The national registry for COVID-19 in pregnancy described here is a tool for sharing and centralizing data related to exposures to SARS-CoV-2 during pregnancy in a structured way. It should speed up the process of prospectively obtaining a large unbiased data set and will collect information at national level.

## Study hypothesis and objectives

### Hypothesis

The COVID 19 disease affects pregnancy and has an influence on maternal and perinatal morbidity and mortality

### Objectives

This study focuses on the creation of a registry of pregnant women with COVID-19 infection, which will help establish and monitor the set of measures to improve their care.

### Primary objective

Collect and analyse COVID-19 cases in pregnant and postpartum women at associated health centres.

### Secondary objectives

1. Establish incidence of COVID-19 infections diagnosed in pregnant women in the Spanish population.
2. Determine the variables that are associated with more maternal and neonatal morbidity.
3. Determine if there is vertical transmission.
4. Evaluate the risk of SARS-CoV-2 infection during pregnancy.
5. Characterize the clinical course of SARS-CoV-2 infection during pregnancy (for example, severity of maternal symptoms, distribution of gestational age at onset, ICU admission, mechanical ventilation, death).
6. Quantify the risk of adverse pregnancy outcomes (e.g., miscarriage, stillbirth, growth restriction) and neonatal outcomes (e.g., NICU, prematurity, death, birth defects).
7. Identify additional risk factors and risk modifiers (e.g., symptomatic infection, SARS-CoV-2 positive amniotic fluid, co-infections).

8. Develop a responsive data collection tool across a network of healthcare facilities to ensure rapid assessment of risks associated with future emerging pathogens and to help develop guidelines on this disease.
9. Strengthen capacity-building in data exchange against emerging pathogens.

The collected dataset will allow a comprehensive characterization of the risks associated with SARS-CoV-2 infection in pregnancy. In the future, the developed structure will allow a rapid assessment of the risks linked to future emerging pathogens.

## Study design

Prospective observational registry study of pregnant women with suspected SARS-CoV-2 infection at any time during pregnancy with positive test results for SARS-CoV-2.

A specific database will be developed, which will include the baseline characteristics of the pregnant women, aspects related to the course of pregnancy and childbirth, and the new-born. Vertical transmission will be analysed only by means of a nasopharyngeal swab from the new-born before contact with the mother. This registry sets an observation deadline of up to 14 days after birth for the new-born and 6 weeks postpartum for the mother. The registry will be hosted on a secure https server, this server will be physically located at **OBS Covid Spain** of the company ReserArch which has a contract with the Puerta de Hierro-Majadahonda University Hospital Research Foundation.

Recruitment period will be between 1st March 2020 and 1st March 2021.

After that, different sub-analyses will be carried out with the data extracted in the registry and the secondary objectives will be addressed.

## Definitions

### Definition of case and healthy patient for the study

The result in the PCR test on a sample of nasopharyngeal and/or oropharyngeal swab was considered synonymous with exposure/non-exposure, defining a case as any pregnant woman with a positive result, regardless of the symptoms. Those cases with clinical presentation of COVID-19 were classified according to the WHO division for adults into: mild symptoms, mild-moderate pneumonia, severe pneumonia and septic shock (16).

The recommended samples for diagnosis are samples from the upper respiratory tract: nasopharyngeal and/or oropharyngeal swab.

A healthy patient is considered to have a negative PCR in the absence of symptoms. Patients with positive IgM or IgG serology cannot be included. The absence of serology does not prevent classifying the patient as healthy if the PCR is negative.

### Definitions of symptomatic and asymptomatic patient

- Acute symptomatic patient: Positive PCR. Manifests any of the symptoms compatible with COVID-19 at the time of the study or analysis or during admission. These symptoms may vary based on new findings.
- Symptomatic patient: Patients with symptoms before 14 days of delivery, even if they no longer have symptoms at the time of delivery.
- Asymptomatic patient: Positive PCR. No symptoms compatible with COVID-19 were observed at the time of the study or analysis.
- Ex-symptomatic or cured patient: Positive or negative PCR. The patient was symptomatic (PCR+) more than 14 days before delivery and no longer has any of the symptoms compatible with COVID-19 at the time of the study or analysis. Patient can be IgM positive or negative, but shall be IgG+ if serology is available
- Symptomatic patient with sequelae: Positive or negative PCR. The patient was symptomatic (PCR+) and has any of the sequelae recognized after COVID-19 at the time of data analysis. These sequelae may vary based on new findings.

## Study population and selection criteria

For the characterization of the clinical course of SARS-CoV-2 infection during pregnancy, the pre-study sample size calculation has not been carried out, as registry-based studies generally tend to be comprehensive without involving hypotheses.

Patients eligible for follow-up of target population will be any pregnant woman who is suspected or needs to be ruled out as having a SARS-CoV-2 infection at any time during pregnancy with positive test results for SARS-CoV-2 by PCR.

Information regarding each pregnant woman's demographic characteristics, comorbidities and current obstetric history was extracted from the medical history and the patient interview; subsequently, age and race were categorized according to the classification used by the Center for Disease Control and Prevention (CDC) (17).

For the selection of the control group to be collected in the same database, patients with a negative COVID-19 delivery diagnosed by PCR screening at delivery, or less than 3 days before, were considered.

### Exclusion criteria

Pregnant women under the following conditions will be excluded from the registry:

- Inability to give informed consent in the absence of a legal representative.
- If, in the opinion of the researcher, findings in the physical examination, anomalies in the results of the laboratory tests or other medical, social or psychosocial factors could have a negative influence.
- Loss of follow-up data prior to 6 weeks postpartum.

## Overall sample size

Currently, the percentage of pregnant patients who are being diagnosed with COVID-19 is unknown, this being one of the objectives of the study. The registry includes 100 sites that in 2019 cared for a total of 172,000 deliveries (Appendix 1 and 3).

## Data sources and work plan

### Patient referral sources

If the doctor in charge considers it appropriate to inform the patient about the existence and purpose of this registry, he/she may do so. At this time, consent will be requested so that the information derived from the regular monitoring of these patients is incorporated into the data registry, and that said information can be analysed and disclosed for scientific purposes in accord with the confidentiality provisions of the current legislation.

### Data collection

Encrypted health-related personal data is collected prospectively using the **OBS Covid Spain** database of the company ReserArch.

The collection of data on each pregnant woman is planned from the diagnosis of a case in a pregnancy up to 6 weeks after delivery and up to 14 days postpartum in the case of the new-born, based on a manual prepared for the collection of data and for the investigator.

Hospitals enrol their pregnant patients on an ongoing basis, and the information is collected and stored anonymously in two separate phases: the first phase, during the inclusion period that occurs at the time of the SARS-CoV-2 test in the pregnant woman; the second phase, throughout the 2 weeks after birth.

For sites with existing cohorts using methods that comply with registry data collection methods (i.e., systematic inclusion of women screened for SARS-CoV-2 regardless of test results, prospective follow-up, and information

requested as shown in the variables table of appendix 5), the data collected will be entered at the time they join the registry.

Delivery monitoring: the *outcomes* include perinatal and neonatal events, which were collected at the time of delivery and the days immediately afterward. These perinatal events included gestational age, type of delivery, presence of prepartum or premature rupture of membranes before delivery, as well as any medical complications (thromboembolic events, admission to ICU, maternal death) and obstetric complications (hemorrhagic events and hypertensive disorders), while neonatal events included the 5-minute Apgar score, the pH of the umbilical artery and possible complications such as admission to the NICU and neonatal death in the follow-up period or intrauterine foetal death. The definitions of obstetric pathology follow the international criteria of the ACOG and RCOG (18-21).

Follow-up after delivery: Patient follow-up is carried out by the local investigator over the phone and the medical history is consulted from the time the patient is discharged up to 6 weeks later in order to detect late postpartum complications related to COVID 19. In the case of the new-born, the follow-up is 14 days by the investigating neonatology department by telephone and consultation of the patient's medical history to detect symptoms of COVID 19 symptoms. Complications recorded in the mother during this period (mastitis, endometritis, pulmonary embolism) as well as neonatal death or readmission of the new-born due to COVID 19 were considered outcomes of interest and analysed together with those previously described.

### Data quality assurance plan

Several strategies have been implemented to reduce data errors, including a limited number of open questions, a predefined range of values where applicable, an easy-to-use case report form build that uses branching logic to reduce fields to complete, one person per site assigned to data collection, correction of systematic inconsistencies and verification of outliers. The different forms that will be used to collect the data in a systematic way are shown in appendix 1.

### Heterogeneity tests

Populations from diverse genetic, socio-cultural and socio-economic backgrounds can be quite different in their characteristics. Additionally, there may be some disparities between sites with respect to the quality and quantity of data items that each site can measure. This is expected regarding a data collection that allows any site to contribute. Consequently, heterogeneity in effect estimates may be due to clinical differences between pregnant women and/or site-level differences in terms of exposure and outcome determination (reporting or assessment bias). We will formally assess heterogeneity taking into account variations in exposure, covariates, and significant outcomes, and use meta-analysis methods (Q or I<sup>2</sup> statistics, meta-regression, and subgroup analysis) to unravel heterogeneity at central and individual levels. Briefly, we will incorporate individual-level interaction terms in one-stage analysis and random intercepts to account for central-level factors not measured in the regression models mentioned above.

## EXTRACTION OF DATA FROM THE REGISTRY: SUBSTUDIES

Based on the registry prepared, data extraction will be carried out to carry out four sub-studies that address the secondary objectives.

### Substudy 1: Prospective observational study on delivery and vertical transmission to the new-born.

#### Objective/s

1. Determine the variables that are associated with more maternal and neonatal morbidity.
2. Determine if there is vertical transmission.
3. Evaluate the risk of SARS-CoV-2 infection during pregnancy.
4. Characterize the clinical course of SARS-CoV-2 infection during delivery
5. Identify additional risk factors and risk modifiers (e.g., symptomatic infection, SARS-CoV-2 positive amniotic fluid, co-infections).

#### Design

Prospective observational study in 100 Spanish sites

Recruitment: 1st March 2020 to 1st March 2021. Spanish sites collected in Appendix 1.

#### Patients

Patients eligible for follow-up or target population will be any pregnant woman who is suspected of or needs to be ruled out as having SARS-CoV-2 infection at any time during pregnancy with positive test results for SARS-CoV-2 by PCR.

The result of the PCR test on a sample of nasopharyngeal and/or oropharyngeal swab was considered synonymous with exposure/non-exposure, defining a case as any pregnant woman with a positive result, regardless of the symptoms. Those cases with clinical presentation of COVID19 were classified according to the WHO division for adults into: mild symptoms, mild-moderate pneumonia, severe pneumonia and septic shock (16).

The recommended samples for diagnosis are samples from the upper respiratory tract: nasopharyngeal and/or oropharyngeal swab.

#### Primary variables

##### Maternal characteristics

|                                                                        |                           |
|------------------------------------------------------------------------|---------------------------|
| <b>Age, mean years (range)</b>                                         |                           |
| <b>Age groups, n (%)</b>                                               | <20                       |
|                                                                        | 20-34                     |
|                                                                        | ≥35                       |
| <b>Time between COVID-19 diagnosis and delivery, mean days (range)</b> |                           |
| <b>Symptomatology, n (%)</b>                                           | Showing COVID-19 symptoms |
|                                                                        | Asymptomatic              |

##### Delivery characteristics

|                                                 |                    |
|-------------------------------------------------|--------------------|
| <b>Gestational age, mean weeks (range)</b>      |                    |
| <b>Preterm deliveries (&lt;37 weeks), n (%)</b> |                    |
| <b>Start of delivery, n (%)</b>                 | Spontaneous        |
|                                                 | Induced            |
|                                                 | Elective caesarean |

|                                                     |                                           |
|-----------------------------------------------------|-------------------------------------------|
| <b>Type of delivery, n (%)</b>                      | Normal                                    |
|                                                     | Instrumental                              |
|                                                     | Caesarean                                 |
| <b>Weight at birth, mean grams (range)</b>          |                                           |
| <b>Neonatal tests for COVID-19, n (%)</b>           | <12 hours from delivery (Positive ones)   |
|                                                     | 12–48 hours from delivery (Positive ones) |
| <b>Skin-to-skin within first 24 hours, n (%)</b>    |                                           |
| <b>Breastfeeding at immediate postpartum, n (%)</b> |                                           |
| <b>Arterial pH, mean value (range)</b>              |                                           |
| <b>5-minute Apgar score, n (%)</b>                  | <5                                        |
|                                                     | ≥5                                        |
| <b>ICU admission, n (%)</b>                         |                                           |

#### Evaluation 14 days after delivery, N

|                                                   |                                 |
|---------------------------------------------------|---------------------------------|
|                                                   |                                 |
| <b>Symptomatology, n (%)</b>                      | Showing COVID-19 symptoms       |
|                                                   | Asymptomatic                    |
| <b>COVID-19 symptoms</b>                          |                                 |
| <b>Mild symptoms (Symptoms reported at birth)</b> | Cough                           |
|                                                   | Fever                           |
|                                                   | Dyspnoea                        |
|                                                   | New olfactory or taste disorder |
|                                                   | Fatigue/malaise                 |
|                                                   | Altered consciousness           |
|                                                   | Headache                        |
|                                                   | Nausea/vomiting                 |
|                                                   | Diarrhoea                       |
| <b>Mild-moderate pneumonia</b>                    |                                 |
| <b>Severe pneumonia</b>                           |                                 |
| <b>Septic shock/maternal mortality</b>            |                                 |

The rest of the variables are defined in appendix 5

### **Statistics**

For the statistical analysis, the SAS v9.4 software will be used.

The set of groups of variables requested and collected for each enrolled patient will be the same. The demographic and clinical characteristics of the population included will be summarized. Mean, standard deviation, minimum and maximum or median and interquartile intervals will be used for continuous variables, according to the distribution. The corresponding absolute and relative frequency will be reported for the discrete variables.

An analysis of the possible association of both the characteristics of the patients and the outcomes collected with COVID-19 infection will be carried out using Pearson's Chi-square test or Fisher's exact test and the Mann-Whitney U test (after verification of the absence of normal data by the Kolmogorov-Smirnov test). See section on Data Quality Plan and sample size. Statistical significance was established with  $P < 0.05$ .

# Substudy 2: Prospective observational study on maternal and neonatal morbidity in pregnant women with COVID-19

## Objective/s

1. Determine the variables that are associated with more maternal and neonatal morbidity.
2. Characterize the clinical course of SARS-CoV-2 infection during pregnancy (for example, severity of maternal symptoms, distribution of gestational age at onset, ICU admission, mechanical ventilation, death).
3. Identify additional risk factors and risk modifiers (e.g., symptomatic infection, SARS-CoV-2 positive amniotic fluid, co-infections).

## Design

Descriptive Observational Study

Recruitment: 1st March 2020 to 1st March 2021. Spanish sites collected in Appendix 1.

## Patients

Patients eligible for follow-up or target population will be any pregnant woman who is suspected of or needs to be ruled out as having SARS-CoV-2 infection at any time during pregnancy with positive test results for SARS-CoV-2 by PCR.

The result in the PCR test on a sample of nasopharyngeal and/or oropharyngeal swab was considered synonymous with exposure/non-exposure, defining a case as any pregnant woman with a positive result, regardless of the symptoms. Those cases with clinical presentation of COVID19 were classified according to the WHO division for adults into: mild symptoms, mild-moderate pneumonia, severe pneumonia and septic shock (16).

The recommended samples for diagnosis are samples from the upper respiratory tract: nasopharyngeal and/or oropharyngeal swab.

## Primary variables

|                                                    |                                      |
|----------------------------------------------------|--------------------------------------|
| Age                                                | Premature rupture of membranes (PRM) |
| Race                                               | Preterm PRM                          |
| Weight at the beginning of pregnancy               | NICU admission                       |
| BMI: Body Mass Index                               | NICU admission days                  |
| Single or Multiple Gestation                       | APGAR 5                              |
| IVF with egg donation and IVF without egg donation | Arterial pH                          |
| Medical comorbidity                                | Postpartum haemorrhage               |
| Blood group and Rh                                 | Abruptio placentae                   |
| Maternal mortality                                 | Severe preeclampsia                  |
| ICU admission                                      | HELLP                                |
| Intrauterine foetal mortality                      | Pulmonary embolism                   |
| COVID 19 diagnosis date                            | Endometritis                         |
| Delivery < 37 weeks                                | Mastitis                             |
| Delivery Type                                      |                                      |

|                                                   |                                 |
|---------------------------------------------------|---------------------------------|
| <b>COVID-19 symptoms</b>                          |                                 |
| <b>Mild symptoms (Symptoms reported at birth)</b> | Cough                           |
|                                                   | Fever                           |
|                                                   | Dyspnoea                        |
|                                                   | New olfactory or taste disorder |
|                                                   | Fatigue/malaise                 |
|                                                   | Altered consciousness           |
|                                                   | Headache                        |
|                                                   | Nausea/vomiting                 |
|                                                   | Diarrhoea                       |
| <b>Mild-moderate pneumonia</b>                    |                                 |
| <b>Severe pneumonia</b>                           |                                 |
| <b>Septic shock/maternal mortality</b>            |                                 |

The rest of the variables are defined in appendix 5

## Statistics

For the statistical analysis, the SAS v9.4 software will be used.

The set of groups of variables requested and collected for each enrolled patient will be the same. The demographic and clinical characteristics of the population included will be summarized. Mean, standard deviation, minimum and maximum or median and interquartile intervals will be used for continuous variables, according to the distribution. The corresponding absolute and relative frequency will be reported for the discrete variables.

An analysis of the possible association of both the characteristics of the patients and the outcomes collected with COVID-19 infection will be carried out using Pearson's Chi-square test or Fisher's exact test and the Mann-Whitney U test (after verification of the absence of normal data by the Kolmogorov-Smirnov test). See section on Data Quality Plan and sample size. Statistical significance was established with  $P < 0.05$ . All statistical analyses were carried out with SAS 9.4 software.

## Substudy 3. Cohort study on obstetric pathology.

### Objective/s

The purpose of this study was to test if pregnant patients with COVID-19 have more obstetrical morbidity than those non-infected.

- Determine the variables that are associated with more maternal and neonatal morbidity.
- Quantify the risk of adverse pregnancy outcomes (e.g., miscarriage, stillbirth, growth restriction) and neonatal outcomes (e.g., NICU, prematurity, death, birth defects).

### Design

Longitudinal cohort case study to quantify the obstetrical and perinatal morbi-mortality throughout all hospitals in Spain with a universal, consecutive PCR based screening program.

Recruitment: 1st March 2020 to 1st March 2021. Spanish sites collected in Appendix 1.

### Patients

Case eligibility criteria included individuals with laboratory confirmation of COVID-19 infection, irrespective of clinical signs and symptoms or the result of another serological test. Positive RNA PCR test from maternal nasopharyngeal swabs.

The selection of the control group will be collected in the same database, considering patients with negative COVID-19 delivery diagnosed by PCR screening at the time of delivery or less than 3 days before.

The delivery or deliveries that were treated in this site and that occurred within the same day, before and after the case (maximum 3 per case), are included in the control group. If the case were the last delivery of the day, the first ones of the following day could be recruited. If the case were the first of that day, the last one of the previous day could be recruited.

The data collected will be entered at the time they join the registry.

Delivery monitoring: the *outcomes* include perinatal and neonatal events, which were collected at the time of delivery and the days immediately afterward. These perinatal events included gestational age, type of delivery, presence of prepartum or premature rupture of membranes before delivery, as well as any medical complications (thromboembolic events, admission to ICU, maternal death) and obstetric complications (hemorrhagic events and hypertensive disorders), while neonatal events included the 5-minute Apgar score, the pH of the umbilical artery and possible complications such as admission to the NICU and neonatal death in the follow-up period or intrauterine foetal death. The definitions of obstetric pathology follow the international criteria of the ACOG and RCOG (18-21).

Follow-up after delivery: Patient follow-up is carried out by the local investigator over the phone and the medical history is consulted from the time the patient is discharged up to 6 weeks later in order to detect late postpartum complications related to COVID 19. In the case of the new-born, the follow-up is 14 days by the investigating neonatology department by telephone and consultation of the patient's medical history to detect symptoms of COVID 19 symptoms. Complications recorded in the mother during this period (mastitis, endometritis, pulmonary embolism) as well as neonatal death or readmission of the new-born due to COVID were considered *outcomes* of interest and analysed together with those described above.

### Primary variables

#### Maternal characteristics

|                                         |                    |
|-----------------------------------------|--------------------|
| <b>Maternal age (years: mean/range)</b> |                    |
| <b>Age range</b>                        | 18-24              |
|                                         | 25-34              |
|                                         | 34-49              |
| <b>Ethnicity</b>                        | White European     |
|                                         | Latino Americans   |
|                                         | Black non-Hispanic |
|                                         | Asian non-Hispanic |
|                                         | Arab               |
| <b>Nulliparous</b>                      |                    |
| <b>Smoking</b>                          |                    |
| <b>ICU admission</b>                    |                    |
| <b>COVID 19 diagnosis date</b>          |                    |
| <b>Delivery &lt;37 weeks</b>            |                    |

#### Maternal comorbidities

|                                     |                                        |
|-------------------------------------|----------------------------------------|
| <b>Obesity (BMI&gt; 30 kg/m2)</b>   |                                        |
| <b>Cardiovascular comorbidities</b> | Chronic Cardiac Disease                |
|                                     | Pre-pregnancy HT                       |
| <b>Pulmonary comorbidities</b>      | Chronic Pulmonary Disease (not asthma) |
|                                     | Asthma                                 |
| <b>Hematologic comorbidities</b>    | Chronic Blood Disease                  |
|                                     | Thrombophilia                          |
|                                     | Antiphospholipid syndrome              |

#### COVID-19 symptoms

|                                                   |                                 |
|---------------------------------------------------|---------------------------------|
| <b>Mild symptoms (Symptoms reported at birth)</b> | Cough                           |
|                                                   | Fever                           |
|                                                   | Dyspnoea                        |
|                                                   | New olfactory or taste disorder |
|                                                   | Fatigue/malaise                 |
|                                                   | Altered consciousness           |
|                                                   | Headache                        |
|                                                   | Nausea/vomiting                 |
|                                                   | Diarrhoea                       |
| <b>Mild-moderate pneumonia</b>                    |                                 |
| <b>Severe pneumonia</b>                           |                                 |
| <b>Septic shock/maternal mortality</b>            |                                 |

#### Delivery Type

|                                |
|--------------------------------|
| Premature rupture of membranes |
| Preterm PRM                    |
| NICU admission                 |

|                        |
|------------------------|
| NICU admission days    |
| Postpartum haemorrhage |
| Abruptio placentae     |
| Severe Preeclampsia    |
| HELLP                  |
| Pulmonary embolism     |

The rest of the variables are described in appendix 5

### Statistics

For the descriptive analysis, categorical variables were expressed as absolute and relative frequencies; whereas quantitative ones were expressed as mean and range (minimum-maximum values). Analysis of the possible association of both the characteristics of the patients and the *outcomes* collected with COVID-19 infection is carried out using the Pearson Chi-square test or Fisher's exact test and the Mann-Whitney U test (after checking the absence of normal data using the Kolmogorov-Smirnov test). See sections of Data Quality Plan and sample size. Statistical significance was established with  $P < 0.05$ . All statistical analyses were carried out with SAS 9.4 software.

For each response variable (*outcome*) a multiple logistic regression model has been carried out, refined with the backward conditional stepwise method.

The response variables are those described in the previous section. The subset of explanatory variables is different for each model and is specified in the text.

It will only be of interest the Odds Ratio (OR), its 95% CI and the significance of the “COVID” factor. The information on the rest of the explanatory variables is irrelevant since they only act as adjustment variables.

## Substudy 4. Epidemiological prevalence study

### Objective/s

Determine the prevalence of SARS\_COV2 infection in Spanish pregnant women

### Design

Cross-sectional study.

The nQuery Advisor Release 7.0 software was used to calculate the sample size, based on the available data. As we do not have data on the prevalence of COVID-19, we set an expected percentage of 50% (a situation that maximizes the sample size) of asymptomatic women during delivery. We determined the sample size for a COVID-19 delivery prevalence study with an expected prevalence of 50%, a 95% confidence level and 5% accuracy, resulting in a sample size of 1056 pregnant women.

The selection of pregnant women in the sample will follow the distribution of the delivery rate by communities and hospitals in Spain according to the INE data for 2018 (Appendix 3) (15). Subsequently, a simple random selection procedure will be carried out in each site, creating a numerical list of the women to be included in the sample (Appendix 1). Pregnant women will be assigned a consecutive number from one onwards according to their due date. Subsequently, the pregnant women who will be part of the sample will be chosen when the number that identifies them is within the table previously created through the random procedure.

Recruitment: 1st March 2020 to 1st March 2021. Spanish sites collected in the Appendix 1

### Patients

Delivery of pregnant women in Spanish maternity wards with a diagnostic test for COVID-19.

### Inclusion criteria:

- Single or multiple gestations of 24 weeks or more without a positive laboratory test for COVID-19 prior to delivery.
- Delivery in a public or private maternity hospital in Spain with a diagnostic test for COVID-19 using PCR Kits within 72 hours prior to delivery or 24 hours after delivery.
- The presence of comorbidity is not an exclusion criterion (asthma, diabetes mellitus, hypertension-preeclampsia, endocrine disorder, dermatological pathology or other obstetric or medical-surgical pathologies).
- Acceptance by the pregnant woman to participate in the study by means of informed consent for group study.

The result of the PCR test on a sample of nasopharyngeal and/or oropharyngeal swab was considered synonymous with exposure/non-exposure, defining a case as any pregnant woman with a positive result, regardless of the symptoms. Those cases with clinical presentation of COVID-19 were classified according to the WHO division for adults into: mild symptoms, mild-moderate pneumonia, severe pneumonia and septic shock (16).

The recommended samples for diagnosis are samples from the upper respiratory tract: nasopharyngeal and/or oropharyngeal swab.

A healthy patient is considered to have a negative PCR in the absence of symptoms. Patients with positive IgM or IgG serology cannot be included. The absence of serology does not prevent classifying the patient as healthy if the PCR is negative.

### **Primary variables**

|                                      |                                |
|--------------------------------------|--------------------------------|
| Age                                  | Delivery < 37 weeks            |
| Race                                 | Delivery Type                  |
| Weight at the beginning of pregnancy | Premature rupture of membranes |
| Body Mass Index (BMI)                | Preterm PRM                    |
| Blood type                           | NICU admission                 |
| Single or Multiple                   | NICU admission days            |
| IVF                                  | Postpartum haemorrhage         |
| Obesity BMI> 30                      | Abruptio placentae             |
| Vascular comorbidities               | Severe Preeclampsia            |
| Pulmonary comorbidity                | HELLP                          |
| Maternal mortality                   | Pulmonary embolism             |
| ICU admission                        | COVID 19 diagnosis date        |

The rest of the variables are described in appendix 5

## Statistics

For the statistical analysis, the SAS v9.4 software will be used.

The set of groups of variables requested and collected for each enrolled patient will be the same. The demographic and clinical characteristics of the population included will be summarized. Mean, standard deviation, minimum and maximum or median and interquartile intervals will be used for continuous variables, according to the distribution. The corresponding absolute and relative frequency will be reported for the discrete variables.

The possible association of both the characteristics of the patients and the *outcomes* collected with COVID-19 infection using the Pearson Chi-square test or Fisher's exact test and the Mann-Whitney U test (after checking the absence of normal data using the Kolmogorov-Smirnov test). Statistically significant associations were considered when the p value was less than 0.05. For those categorical variables in which statistically significant differences were identified, the corresponding Odds Ratio (OR) and 95% Confidence Intervals (95% CI) were estimated using univariate logistic regression models.

Logistic regressions, both univariate and multivariate, will be performed, determining the odd ratio and its 95% confidence interval.

## Management and reporting of adverse reactions

As it is an epidemiological study without a drug under study, the provisions on Pharmacovigilance in Ministerial Order SAS/3470/2009 and Royal Decree 577/2013 in relation to reporting adverse reactions to approved drugs will be followed. Investigators who are aware of possible adverse reactions during the study should notify them as quickly as possible to the Autonomous Center for Pharmacovigilance corresponding to their healthcare area, through any of the channels that the institution makes available (through the yellow card system or via online through the SINAEM website). It is also recommended that the Investigator (or reporting doctor) reports all adverse reactions to the marketing authorization holder of the drugs involved. Additionally, the conditions of use outside the marketing authorization of the drug must be reported (e.g.: off-label use, overdose, misuse, abuse and medication errors) or occupational exposure, as well as cases of suspected drug interactions, pregnancy, exposure during breastfeeding and lack of efficacy.

## Ethical aspects

This study will be carried out under conditions of respect for the fundamental rights of the person and the ethical principles that affect biomedical research with human beings, following the international recommendations contained in the Declaration of Helsinki, and its subsequent revisions. Likewise, national recommendations will be followed in accordance with the Biomedical Research Law 14/2007.

During the completion of this study, the investigators will strictly adhere to the provisions of this protocol, fully completing the Case Report Form.

## Informed consent

In accordance with the criteria of good clinical practice, the subjects will be duly informed of all those details concerning their participation in the study and will freely give their consent in writing or orally, recording this fact in their medical records.

Preferably written or oral consent will be sought for cases and controls chosen at random from among pregnant women who have given birth in each centre and who have COVID-19. The patient may sign the consent electronically (See appendix 7).

### Safety Measures and Confidentiality

Protection of human subjects: Pregnant women and newborns participate in the registry as mentioned above. No biological samples are collected for specific analysis in this study.

The laboratory tests collected in the registry will be those carried out in each site according to its protocol. No extra lab tests will be carried out for this study and there is no handling of biological tests. The data collected through the national registry for SARS-CoV-2 in pregnancy does not contain personally identifiable information.

The data of the subjects included in it will be treated in accordance with Organic Law 3/2018, of 5th December, on the Protection of Personal Data and guarantee of digital rights.

### Use of the data contained in the registry

The use of the data contained in this registry within any scientific research project will previously require:

- Approval by the local Clinical Research Ethics Committee (CREC) of the study site.
- Approval by the Scientific Committee, a body that will be constituted to give scientific output to the database.
- Signing of the data protection law contract.

A citation policy will be established for the registry, as well as for the authorship order of the different sites providing patients to each research project.

## References

1. World Health Organization (WHO) [Internet]. Emergencies preparedness, response Pneumonia of Unknown Cause - China. (Date of publication: 05/01/2020). Available at: <https://www.who.int/csr/don/05-january-2020-pneumonia-of-unknown-cause-china/es/>
2. Health Alerts and Emergencies Coordination Center of the Ministry of Health [Internet]. Update No. 37. Coronavirus disease (COVID-19). (Update date: 03/05/2020). Available at: [https://www.mscbs.gob.es/profesionales/saludPublica/ccayes/alertasActual/nCov-China/documentos/Actualizacion\\_37\\_COVID-19.pdf](https://www.mscbs.gob.es/profesionales/saludPublica/ccayes/alertasActual/nCov-China/documentos/Actualizacion_37_COVID-19.pdf)
3. Ministry of Health [Internet]. Management of pregnant women and newborns with COVID-19 - Technical document. 17th June 2020 version. Available at: [https://www.mscbs.gob.es/profesionales/saludPublica/ccayes/alertasActual/nCov-China/documentos/Documento\\_manejo\\_embarazo\\_recien\\_nacido.pdf](https://www.mscbs.gob.es/profesionales/saludPublica/ccayes/alertasActual/nCov-China/documentos/Documento_manejo_embarazo_recien_nacido.pdf)
4. Favre G, Pomar L, Musso D, Baud D. 2019-nCoV epidemic: what about pregnancies? Lancet 2020. 395(10224):e40. doi:10.1016/S0140-6736(20)30311-1
5. Bikdeli B, Madhavan MV, Jimenez D, et al. COVID-19 and Thrombotic or Thromboembolic Disease: Implications for Prevention, Antithrombotic Therapy, and Follow-up. J Am Coll Cardiol 2020 doi: 10.1016/j.jacc.2020.04.031 [published Online First: 15 April5.

6. Royal College of Obstetrician and Gynecologist [Internet]. Coronavirus (COVID-19) infection and pregnancy. Versión 11. Fecha de actualización: 24/07/2020. Available at: <https://www.rcog.org.uk/globalassets/documents/guidelines/2020-07-24-coronavirus-covid-19-infection-in-pregnancy.pdf>
7. Martínez-Perez O. , Vouga M., Cruz Melguizo S. et al. Association Between Mode of Delivery Among Pregnant Women With COVID-19 and Maternal and Neonatal Outcomes in Spain JAMA. Published online June 8, 2020. doi:10.1001/jama.2020.10125
8. Encinas B, Caño A, Marcos B, Sanz A, Rodríguez I, Hernando P et al. Spanish registry of COVID-19 screening in asymptomatic pregnant women. Spanish Journal of Epidemiology. Accepted for publication. May 2020
9. Knight M, Bunch K, Vousden N, et al. Characteristics and outcomes of pregnant women admitted to hospital with confirmed SARS-CoV-2 infection in UK: national population-based cohort study. BMJ 2020;369:m2107. doi: 10.1136/bmj.m2107
10. Chen H, Guo J, Wang C, Luo F, Yu X, Zhang W, et al. Clinical characteristics and intrauterine vertical transmission potential of COVID-19 infection in nine pregnant women: a retrospective review of medical records. Lancet 2020
11. Zhu H, Wang L, Fang C, Peng S, Zhang L, Chang G, et al. Clinical analysis of 10 neonates born to mothers with 2019-nCoV pneumonia. Transl Pediatr 2020;9:51-60.
12. Baud D, Greub G, Favre G, et al. Second-Trimester Miscarriage in a Pregnant Woman With SARS-CoV-2 Infection. JAMA. 2020;323(21):2198–2200. doi:10.1001/jama.2020.7233
13. Groß R, Conzelmann C, Müller JA, Stenger S, Steinhart K, Kirchhoff F et al. Detection of SARS-CoV-2 in human breastmilk. Lancet. 2020 Jun 6;395(10239):1757-1758.
14. World Health Organization [Internet]. Clinical Management of COVID-19. (Update date: 05/27/2020). Available at: [https://www.who.int/publications/i/item/clinical-management-of-severe-acute-respiratory-infection-when-novel-coronavirus-\(ncov\)-infection-is-suspected](https://www.who.int/publications/i/item/clinical-management-of-severe-acute-respiratory-infection-when-novel-coronavirus-(ncov)-infection-is-suspected)
15. National Institute of Statistics (INE). [Internet]. Births 2018. Births by province of residence of the mother, age of the mother and age group of the father. Visited on 05/02/2020. Available at: <https://www.ine.es/jaxi/Datos.htm?path=/t20/e301/nacim/a2018/10/&file=03001.px#!tab=bs-tabla>
16. World Health Organization. Clinical Management of COVID-19. Interim Guidance. May 27, 2020. Accessed Aug 3, 2020. Available at: <https://www.who.int/publications/i/item/clinical-management-of-covid-19>
17. Ellington S, Strid P, Tong VT, Woodworth K, Galang RG, Zambrano LD et al. Characteristics of Women of Reproductive Age with Laboratory-Confirmed SARS-CoV-2 Infection by Pregnancy Status. MMWR Morb Mortal Wkly Rep 2020; 69(25): 769-775.
18. American College of Obstetricians and Gynecologists' Committee on Practice Bulletins—Obstetrics. Prelabor Rupture of Membranes: ACOG Practice Bulletin, Number 217. Obstet Gynecol. 2020;135(3):e80-e97.

19. Thomson AJ; Royal College of Obstetricians and Gynaecologists. Care of Women Presenting with Suspected Preterm Prelabour Rupture of Membranes from 24+0 Weeks of Gestation: Green-top Guideline No. 73. BJOG. 2019;126(9):e152-e166.
20. Brown MA, Magee LA, Kenny LC, Karumanchi SA, McCarthy FP, Saito S et al. Hypertensive Disorders of Pregnancy: ISSHP Classification, Diagnosis, and Management Recommendations for International Practice. Hypertension. 2018;72(1):24-43.
21. Zhou F, Yu T, Du R, Fan G, Liu Y, Liu Z et al. Clinical course and risk factors for mortality of adult inpatients with COVID-19 in Wuhan, China: a retrospective cohort study. Lancet. 2020;395(10229):1054-1062.

## APPENDIX 1. Registry investigators by Autonomous Community

| AUTONOMOUS COMMUNITY | PROVINCE/CITY     | HOSPITAL                                                                              | PRINCIPAL INVESTIGATOR            |
|----------------------|-------------------|---------------------------------------------------------------------------------------|-----------------------------------|
| ANDALUSIA            | ALMERIA           | Poniente Hospital                                                                     | Marta Ruth Meca Casbas            |
|                      |                   | Hospital Universitario Torrecárdenas                                                  | Ana María Fernández Alonso        |
|                      | CADIZ             | Jerez de la Frontera Hospital                                                         | Susana Soldevilla Pérez           |
|                      |                   | Puerta del Mar University Hospital Cadiz                                              | José Roman Broullón Molanes       |
|                      |                   | La Línea Hospital                                                                     | Manuel Domínguez González         |
|                      | CORDOBA           | Punta Europa Hospital                                                                 | Alegria Moreno Gomez              |
|                      |                   | San Juan de Dios Hospital                                                             | Jorge Duro Gomez                  |
|                      |                   | Reina Sofia University Hospital                                                       | Maria Joaquina Gimeno             |
|                      |                   | Infanta Margarita de Cabra Hospital                                                   | Carmen Baena Luque                |
|                      |                   | Montilla and Quirónsalud Córdoba Hospital                                             | Tania Manrique Gomez              |
|                      | GRANADA           | Virgen de las Nieves University Hospital. Bio-health Research Institute (IBS) Granada | Alberto Puertas Prieto            |
|                      |                   | San Cecilio University Hospital. Bio-health Research Institute (IBS) Granada          | África Caño Aguilar               |
|                      | HUELVA            | Santa Ana Hospital Motril                                                             | Encarnación Carmona Sánchez       |
|                      |                   | Juan Ramón Jiménez Hospital                                                           | Maria Reyes Granell Escobar       |
|                      | JAEN              | Riotinto Mines Hospital                                                               | Elena Pascual Salvador            |
|                      |                   | Jaén Hospital Complex                                                                 | Rosario Redondo Aguilar           |
|                      |                   | San Juan de la Cruz Hospital                                                          | Isabel Cabello and Alba Fernández |
|                      | MALAGA            | Alto Guadalquivir Hospital                                                            | Victor Muñoz Carmona              |
|                      |                   | Costa del Sol Hospital                                                                | Maria Caridad Ortiz Herrera       |
|                      |                   | AGSE Hospital Axarquía                                                                | M. Belén Garrido Luque            |
|                      |                   | Virgen de la Victoria University Hospital                                             | Marta Camacho Caro                |
|                      |                   | Serranía de Ronda Hospital                                                            | Isabel Mena Piedra                |
|                      |                   | Regional Hospital of Malaga                                                           | Maria Suarez Arana                |
|                      |                   | Quirónsalud Malaga Hospital                                                           | Marta García Sánchez              |
|                      | SEVILLE           | Viamed Hospital, Chacón Group                                                         | José Antonio Sainz Bueno          |
|                      |                   | Valme Hospital                                                                        | Rosa Ostos Serna                  |
|                      |                   | Virgen del Rocío Hospital                                                             | Lucas Cerrillos González          |
|                      |                   | Virgen Macarena University Hospital                                                   | Maria del Pilar Guadix Martin     |
| ASTURIAS             | ASTURIAS          | HUCA                                                                                  | Jose Adáñez Garcia                |
|                      |                   | San Agustín University Hospital                                                       | Eva Maria Oviedo Pérez            |
| CASTILLA LA MANCHA   | CIUDAD REAL       | University Hospital of Cabueñes                                                       | Oscar Vaquerizo Ruiz              |
|                      |                   | General University Hospital of Ciudad Real                                            | Antonio Sánchez Muñoz             |
|                      |                   | La Mancha Centro General Hospital                                                     | Mercedes Ramírez Gómez            |
| CASTILLE and LEON    | CUENCA            | University Hospital of Puerto Real                                                    | Carmen González Macías            |
|                      |                   | Virgen de la Luz Hospital                                                             | Maria José Núñez Valera           |
|                      | BURGOS            | Burgos Hospital                                                                       | Rubén Alonso Saiz                 |
|                      | LEON              | Leon Healthcare Complex                                                               | Camino Fernández                  |
|                      | SALAMANCA         | Salamanca University Care Complex                                                     | Ana Villalba Yarza                |
|                      |                   | Valladolid University Clinical Hospital                                               | Cristina Álvarez Colomo           |
|                      | VALLADOLID        | Río Hortega University Hospital                                                       | Rut Bernardo Vega                 |
| CATALONIA            | BARCELONA         | Alma Posadas San Juan                                                                 | Mónica Catalina Coello            |
|                      |                   | Virgen de la Concha Hospital of Zamora                                                | Elena Ferriols Pérez              |
| CEUTA                | CEUTA             | Hospital del Mar                                                                      | Maria Del Carmen Medina Mallén    |
| EXTREMADURA          | CEUTA             | Santa Creu i Sant Pau Hospital                                                        | José Ruiz Aragon                  |
| GALICIA              | Cáceres           | Hospital Universitario de Ceuta                                                       | Juan Carlos Wizner de Alva        |
|                      | A Coruña          | Hospital San Pedro de Alcántara                                                       | Maria Jesús Janeiro Freire        |
|                      | Ferrol            | Hospital Universitario A Coruña                                                       | Raquel Gonzalez Seoane            |
|                      | Santiago          | C.H. Universitario Ferrol                                                             | Maria Begoña Dueñas Carazo        |
| ISLAS BALEARES       | Mallorca          | Complejo Hospitalario de Santiago de Compostela                                       | Esther Alvarez Silveas            |
|                      |                   | Complejo Hospitalario Universitario de Ourense                                        | Eva Morán Antolín                 |
|                      |                   | Hospital Son Espases                                                                  | Nofre Alomar Mateu                |
| LA RIOJA             | Logroño           | Hospital Comarcal de Inca                                                             | Albert Tubau Navarra              |
|                      |                   | Hospital Universitario Son Llàtzer                                                    | Ángeles Sanchez-Vegazo García     |
| MADRID               | Majadahoda        | Complejo Hospitalario San Millán – San Pedro                                          | Begoña Encinas Pardilla           |
|                      |                   | Hospital Universitario Puerta de Hierro Majadahonda                                   | Sara Cruz Melguizo                |
|                      |                   |                                                                                       | Paloma Hernandez                  |
|                      |                   |                                                                                       | Amelia Sanz Lorenzana             |
|                      |                   |                                                                                       | Rita Salvador López               |
|                      | Madrid            | Hospital Infanta Sofia                                                                | Carmen Barbancho                  |
|                      |                   | HM Hospitales                                                                         | Pilar Monteliu                    |
|                      |                   | Hospital Universitario de Getafe                                                      | Pablo G Del Barrio                |
|                      | Getafe            |                                                                                       | Laura Forcen                      |
|                      |                   |                                                                                       | Inmaculada Mejia                  |
|                      | Madrid            | Hospital 12 de Octubre                                                                | Iria Rodriguez                    |
|                      |                   |                                                                                       | Silvia Mateos                     |
|                      | Torrejon de Ardoz | Hospital de Torrejón                                                                  | Irene Fernández Buhigas           |
|                      | Fuenlabrada       | Hospital Universitario de Fuenlabrada                                                 | Maria Teulon                      |
|                      | Aranjuez          | Hospital del Tajo                                                                     | Alejandra Maria Cano Garcia       |
|                      | Pozuelo           | Hospital Quirónsalud Madrid                                                           | Olga Nieto                        |
| MURCIA               | Madrid            | Hospital Clínico San Carlos                                                           | Noelia Perez Perez                |
|                      |                   | Hospital Universitario Severo Ochoa                                                   | Carmen María Orizales             |
|                      | Leganes           | Hospital Rafael Méndez                                                                | Magdalena Molina                  |
|                      | Lorca             | H U Virgen de la Arrixaca                                                             | Lucia Meca                        |
| PAÍS VASCO           | Murcia            | H U Santa Lucia                                                                       | Rocio Lopez Lopez                 |
|                      | Cartagena         | Hospital Universitario Araba                                                          | Irene Gastaca Abasolo             |
| COMUNIDAD VALENCIANA | Alava             | Hospital U de Bilbao                                                                  | Mercedes Fraca Padilla            |
|                      | Guipúzcoa         | Hospital de Donosti                                                                   | Jose Navarria Martínez            |
|                      | Guipúzcoa         | Hospital Goierri -Alto Urola en Zumarraga Gipuzkoa                                    | Carmen Álvarez                    |
|                      | Guipúzcoa         |                                                                                       | Beatriz Bueno                     |
| COMUNIDAD VALENCIANA | Valencia          | Hospital Universitario La Fe                                                          | Alicia Martinez                   |
|                      | Valencia          | Hospital Peset                                                                        | Cristina Ruiz Aguilar             |
|                      | Alicante          | Hospital de Villalopo                                                                 | Maria Isabel Conca Rodero         |

## APPENDIX 2: Database forms

A total of 15 forms will be completed, collected in the following table.

---

### FORMS

Baseline form

History Form

COVID19 diagnosis

Ward/ICU admission

Pregnancy follow-up 12 weeks

Pregnancy follow-up 20 weeks

Pregnancy follow-up 35 weeks

Gestational control

Emergency visit

Delivery form

Basic new-born form

Second twin form

Lab tests

Blood type

Anaesthesia

End Form

---

Appendix 3: Case distribution according to Spanish provinces (INE 2018): data adapted to the study.

| 7  |                           | Total nacimientos | %     |   | Total test | %     |
|----|---------------------------|-------------------|-------|---|------------|-------|
| 8  | Total                     | 370.827           | 100   |   | 1056       | 100   |
| 9  | 02 Albacete               | 3.040             | 0,82  | ✓ | 8,66       | 0,82  |
| 10 | 03 Alicante/Alacant       | 14.161            | 3,82  | ✓ | 40,33      | 3,82  |
| 11 | 04 Almería                | 7.417             | 2,00  | ✓ | 21,12      | 2,00  |
| 12 | 01 Araba/Álava            | 2.683             | 0,72  | ✓ | 7,64       | 0,72  |
| 13 | 33 Asturias               | 5.733             | 1,55  | ✓ | 16,33      | 1,55  |
| 14 | 05 Ávila                  | 979               | 0,26  | ✓ | 2,79       | 0,26  |
| 15 | 06 Badajoz                | 5.210             | 1,40  | ✓ | 14,84      | 1,40  |
| 16 | 07 Balears, Illes         | 10.285            | 2,77  | ✓ | 29,29      | 2,77  |
| 17 | 08 Barcelona              | 46.687            | 12,59 | ✓ | 132,95     | 12,59 |
| 18 | 48 Bizkaia                | 7.945             | 2,14  | ✓ | 22,62      | 2,14  |
| 19 | 09 Burgos                 | 2.351             | 0,63  | ✓ | 6,69       | 0,63  |
| 20 | 10 Cáceres                | 2.611             | 0,70  | ✓ | 7,44       | 0,70  |
| 21 | 11 Cádiz                  | 10.246            | 2,76  | ✓ | 29,18      | 2,76  |
| 22 | 39 Cantabria              | 3.805             | 1,03  | ✓ | 10,84      | 1,03  |
| 23 | 12 Castellón/Castelló     | 4.580             | 1,24  | ✓ | 13,04      | 1,24  |
| 24 | 13 Ciudad Real            | 3.676             | 0,99  | ✓ | 10,47      | 0,99  |
| 25 | 14 Córdoba                | 6.209             | 1,67  | ✓ | 17,68      | 1,67  |
| 26 | 15 Coruña, A              | 7.132             | 1,92  | ✓ | 20,31      | 1,92  |
| 27 | 16 Cuenca                 | 1.303             | 0,35  | ✓ | 3,71       | 0,35  |
| 28 | 20 Gipuzkoa               | 5.472             | 1,48  | ✓ | 15,58      | 1,48  |
| 29 | 17 Girona                 | 6.745             | 1,82  | ✓ | 19,21      | 1,82  |
| 30 | 18 Granada                | 7.441             | 2,01  | ✓ | 21,19      | 2,01  |
| 31 | 19 Guadalajara            | 2.114             | 0,57  | ✓ | 6,02       | 0,57  |
| 32 | 21 Huelva                 | 4.256             | 1,15  | ✓ | 12,12      | 1,15  |
| 33 | 22 Huesca                 | 1.651             | 0,45  | ✓ | 4,70       | 0,45  |
| 34 | 23 Jaén                   | 4.886             | 1,32  | ✓ | 13,91      | 1,32  |
| 35 | 24 León                   | 2.633             | 0,71  | ✓ | 7,50       | 0,71  |
| 36 | 25 Lleida                 | 3.497             | 0,94  | ✓ | 9,96       | 0,94  |
| 37 | 27 Lugo                   | 1.959             | 0,53  | ✓ | 5,58       | 0,53  |
| 38 | 28 Madrid                 | 57.554            | 15,52 | ✓ | 163,90     | 15,52 |
| 39 | 29 Málaga                 | 13.480            | 3,64  | ✓ | 38,39      | 3,64  |
| 40 | 30 Murcia                 | 14.675            | 3,96  | ✓ | 41,79      | 3,96  |
| 41 | 31 Navarra                | 5.398             | 1,46  | ✓ | 15,37      | 1,46  |
| 42 | 32 Ourense                | 1.486             | 0,40  | ✓ | 4,23       | 0,40  |
| 43 | 34 Palencia               | 983               | 0,27  | ✓ | 2,80       | 0,27  |
| 44 | 35 Palmas, Las            | 7.742             | 2,09  | ✓ | 22,05      | 2,09  |
| 45 | 36 Pontevedra             | 5.983             | 1,61  | ✓ | 17,04      | 1,61  |
| 46 | 26 Rioja, La              | 2.330             | 0,63  | ✓ | 6,64       | 0,63  |
| 47 | 37 Salamanca              | 2.075             | 0,56  | ✓ | 5,91       | 0,56  |
| 48 | 38 Santa Cruz de Tenerife | 7.033             | 1,90  | ✓ | 20,03      | 1,90  |
| 49 | 40 Segovia                | 1.058             | 0,29  | ✓ | 3,01       | 0,29  |
| 50 | 41 Sevilla                | 17.094            | 4,61  | ✓ | 48,68      | 4,61  |
| 51 | 42 Soria                  | 606               | 0,16  | ✓ | 1,73       | 0,16  |
| 52 | 43 Tarragona              | 6.637             | 1,79  | ✓ | 18,90      | 1,79  |
| 53 | 44 Teruel                 | 947               | 0,26  | ✓ | 2,70       | 0,26  |
| 54 | 45 Toledo                 | 5.712             | 1,54  | ✓ | 16,27      | 1,54  |
| 55 | 46 Valencia/València      | 19.277            | 5,20  | ✓ | 54,89      | 5,20  |
| 56 | 47 Valladolid             | 3.463             | 0,93  | ✓ | 9,86       | 0,93  |
| 57 | 49 Zamora                 | 896               | 0,24  | ✓ | 2,55       | 0,24  |
| 58 | 50 Zaragoza               | 7.379             | 1,99  | ✓ | 21,01      | 1,99  |
| 59 | 51 Ceuta                  | 972               | 0,26  | ✓ | 2,77       | 0,26  |
| 60 | 52 Melilla                | 1.340             | 0,36  | ✓ | 3,82       | 0,36  |

## APPENDIX 4: List of sites

| No. | Name of the site                                    | No. | Name of the site                          |
|-----|-----------------------------------------------------|-----|-------------------------------------------|
| 1   | Puerta de Hierro Majadahonda University Hospital    | 51  | Axarquía AGSE Hospital                    |
| 2   | Valladolid University Clinical Hospital             | 52  | HUCA                                      |
| 3   | Virgen de la Arrixaca University Hospital - Murcia  | 53  | Virgen de la Victoria University Hospital |
| 4   | Getafe University Hospital                          | 54  | Santa Ana Hospital Motril                 |
| 5   | Araba University Hospital- Álava                    | 55  | Santa Creu i Sant Pau Hospital            |
| 6   | Donostia Hospital                                   | 56  | FHSJD of Martorell                        |
| 7   | Viamed Hospital, Chacon Group                       | 57  | Bilbao University Hospital                |
| 8   | Poniente Hospital                                   | 58  | QuironSalud Marbella Hospital             |
| 9   | Costa del Sol Hospital                              | 59  | HM Hospitals                              |
| 10  | San Millán Hospital Complex - San Pedro de la Rioja | 60  | Dexeus University Hospital                |
| 11  | Severo Ochoa Leganes University Hospital            | 61  | Virgen del Castillo Hospital              |
| 12  | University Hospital Complex of Ourense              | 62  | Ceuta University Hospital                 |
| 13  | Quironsalud Clideba Hospital                        | 63  | Quironsalud Murcia Hospital               |
| 14  | Rio Hortega University Hospital                     | 64  | Northwest Regional Hospital               |
| 15  | Virgen Concha Hospital - Zamora                     | 65  | Parc Taulí University Hospital - Sabadell |
| 16  | Jerez de la Frontera Hospital                       | 66  | Infanta Margarita de Cabra Hospital       |
| 17  | Santiago de Compostela Hospital Complex             | 67  | San Agustín University Hospital           |
| 18  | Valme Hospital                                      | 68  | University Hospital of Cabueñes           |
| 19  | October 12 Hospital                                 | 69  | Arnau de Vilanova University Hospital     |
| 20  | Torrejón Hospital                                   | 70  | Montilla and Quironsalud Cordoba Hospital |
| 21  | Los Arcos del Mar Menor University Hospital         | 71  | Infanta Sofía Hospital                    |
| 22  | Infanta Leonor University Hospital                  | 72  | Serranía de Ronda Hospital                |
| 23  | Lucus Augusti Hospital                              | 73  | San Juan de la Cruz Hospital              |
| 24  | General University Hospital of Ciudad Real          | 74  | Tajo Hospital                             |
| 25  | A Coruña University Hospital Complex                | 75  | La Linea Hospital                         |
| 26  | Rafael Méndez Hospital                              | 76  | Salamanca University Care Complex         |
| 27  | University Hospital of Fuenlabrada                  | 77  | Quironsalud Madrid Hospital               |
| 28  | La Mancha Centro General Hospital                   | 78  | San Carlos Clinical Hospital              |
| 29  | University Hospital Complex of Pontevedra           | 79  | Alto Guadalquivir Hospital, Andújar       |
| 30  | Leon Healthcare Complex                             | 80  | Mendaro Hospital                          |
| 31  | Ferrol University Hospital                          | 81  | University Clinic of Navarra              |
| 32  | Gregorio Marañón University General Hospital        | 82  | Dr Peset Valencia Hospital                |

|    |                                                                                       |     |                                                     |
|----|---------------------------------------------------------------------------------------|-----|-----------------------------------------------------|
| 33 | San Juan de Dios Hospital                                                             | 83  | Goierry Hospital -Alto Urola - Zumarraga Gipuzkoa   |
| 34 | Alvaro Cunqueiro Hospital                                                             | 84  | Sant Joan de Reus Hospital                          |
| 35 | Reina Sofía University Hospital                                                       | 85  | General Hospital of L'Hospitalet                    |
| 36 | Virgen de las Nieves University Hospital. Bio-health Research Institute (IBS) Granada | 86  | La Fe University Hospital                           |
| 37 | Puerta del Mar University Hospital Cadiz                                              | 87  | Burgos Hospital                                     |
| 38 | General University Hospital Santa Lucía de Cartagena                                  | 88  | Torre Vieja Hospital                                |
| 39 | Torre Cardenas University Hospital                                                    | 89  | Santa Caterina Hospital                             |
| 40 | University Hospital of Puerto Real                                                    | 90  | Josep Trueta Girona University Hospital             |
| 41 | Juan Ramón Jiménez Hospital                                                           | 91  | Regional Hospital of Malaga                         |
| 42 | Virgen del Rocío Hospital                                                             | 92  | Inca Regional Hospital                              |
| 43 | Hospital del Mar                                                                      | 93  | Germans Trias University Hospital                   |
| 44 | Son Espases Hospital                                                                  | 94  | Virgen de la Luz Hospital                           |
| 45 | Virgen Macarena University Hospital                                                   | 95  | Quironsalud Malaga Hospital                         |
| 46 | San Cecilio University Hospital. Bio-health Research Institute (IBS) Granada          | 96  | Riotinto Mines Hospital                             |
| 47 | San Pedro de Alcántara Hospital                                                       | 97  | Son Llàtzer University Hospital - Palma de Mallorca |
| 48 | Jaen Hospital Complex                                                                 | 98  | Joan XXIII University Hospital - Tarragona          |
| 49 | Hospital da Barbanza                                                                  | 99  | La Paz Hospital                                     |
| 50 | La Inmaculada Hospital                                                                | 100 | Vinalopo Hospital                                   |
|    |                                                                                       | 101 | Punta Europa Hospital                               |

## APPENDIX 5. List of variables (separate Excel document)
