# Supplementary material for: The association between SARS-CoV-2 infection and preterm delivery: a prospective study with a multivariable analysis
Source: BMC Pregnancy Childbirth. 2021 Apr 1;21:273. doi: 10.1186/s12884-021-03742-4 (PMC8016158; doi:10.1186/s12884-021-03742-4)
Supplement: Supplementary file 1 — Additional file 1 Registry Protocol. Table S1. List of variables in the Registry (Appendix 5 of Registry Protocol). [file 12884_2021_3742_MOESM1_ESM.zip › Supplementary Table 1, Additional File 1R4.xlsx]

## Sheet: Sheet1
List of variables in the Registry
Form	Field Name	Variable Type	Values of selection	Required	INDER	DEFINITION	REFERENCES
Baseline form	Patient Id	categorical		Yes		identification of the coded patient (hospital code + patient code in order of inclusion in that site)
Baseline form	Hospital	categorical	TEST Hospital;Puerta de Hierro Hospital;Valladolid University Clinical Hospital;Virgen de la Arrixaca University Clinical Hospital;Getafe University Hospital;Araba-Txagorritxu University Hospital;Donostia Hospital;Viamed Santa Ángela de la Cruz Hospital;Poniente Hospital;Costa Hospital del Sol;San Millán y San Pedro Hospital Complex;Severo Ochoa University Hospital;Ourense University Hospital Com…	Yes		patient-corresponding hospital
Baseline form	Control patient	categorical	Yes;No	No		identification of the coded patient (hospital code + patient code in order of inclusion in that site)
Baseline form	Indicate the associated case code	categorical		No	1	in case of control patient, code of the associated case. in prevalence studies. Randomization table code
Baseline form	Demographic data:			No
Baseline form	Date of diagnosis	categorical		Yes		date of visit in which the patient is included in the study
Baseline form	Age (years)	quantitative	years, rounded up	Yes		maternal age
Baseline form	Age (categories)	categorical	18-24, 25-34, 35-49			maternal age	CDC MMWR 26 Jun, 2020
Baseline form	Ethnic Group	categorical	White european, Latino Americans, Black non-hispanic, Asian non-hispanic, Arab	Yes		ethnicity reported by the patient	CDC MMWR 26 Jun, 2020
Baseline form	Date of last menstruation	categorical		Yes		date of last menstruation
Baseline form	Gestational age at diagnosis (weeks)	quantitative	weeks, rounded up	No		weeks of pregnancy
Baseline form	Gestational age at diagnosis (days)	quantitative	days, rounded up	No		days of pregnancy
Baseline form	Gravida Para Abortus	categorical	Yes;No	No			https://www.nice.org.uk/guidance/conditions-and-diseases/fertility--pregnancy-and-childbirth/intrapartum-care
Baseline form	G	categorical		No		G1 = first pregnancy,	https://www.nice.org.uk/guidance/conditions-and-diseases/fertility--pregnancy-and-childbirth/intrapartum-care
Baseline form	P	categorical		No			https://www.nice.org.uk/guidance/conditions-and-diseases/fertility--pregnancy-and-childbirth/intrapartum-care
Baseline form	A	categorical		No			https://www.nice.org.uk/guidance/conditions-and-diseases/fertility--pregnancy-and-childbirth/intrapartum-care
Baseline form	HEIGHT (cm)	quantitative		Yes		mother's height at diagnosis date
Baseline form	Weight (Kg)	quantitative		Yes		mother's weight at diagnosis date
Baseline form	bmi	quantitative				BMI AT FIRST PREGNANCY VISIT, kg/m2
Baseline form	Clinical inclusion criteria:			No		CLINICAL CRITERIA AT ADMISSION
Baseline form	SARS-CoV-2 (COVID-19) infection as the main cause of admission	categorical	Yes;No	Yes		the reason for the visit is suspected COVID infection
Baseline form	Epidemiological factors:			Yes
Baseline form	In the 14 days prior to the onset of the disease, the patient has had:			Yes
Baseline form	Lives in or has traveled to an area with documented cases of COVID-19 infection	categorical	Yes;No	Yes
Baseline form	Intimate contact with a probable or confirmed case of COVID-19 infection, while the patient was asymptomatic	categorical	Yes;No	Yes
Baseline form	Works caring for possible cases of infection	categorical	Yes;No	Yes
Baseline form	Presence in a laboratory that handles suspected or confirmed samples of SARS-CoV-2	categorical	Yes;No	Yes
Baseline form	Direct contact with animals in countries where animal infection is known or cases of disease have been reported in humans with suspected zoonotic transmission.	categorical	Yes;No	Yes
Baseline form	Comorbidities:			No
Baseline form	Chronic heart disease, including congenital heart disease (not hypertension)	categorical	Yes;No	No		Heart failure IN HOSPITAL RECORDS
Baseline form	Chronic lung disease (not asthma)	categorical	Yes;No	No		COPD, allergic rhinitis ... IN HOSPITAL RECORDS
Baseline form	Clinical Diagnosis of Asthma	categorical	Yes;No	No		Reports asthma in medical history or hospital records	https://www.uptodate.com/contents/asthma-in-adolescents-and-adults-evaluation-and-diagnosis?search=asthma%20diagnosis&source=search_result&selectedTitle=1~150&usage_type=default&display_rank=1
Baseline form	Chronic kidney disease	categorical	Yes;No	No		Renal failure IN HOSPITAL RECORDS
Baseline form	Moderate or severe liver disease	categorical	Yes;No	No		Liver failure IN HOSPITAL RECORDS	https://www.uptodate.com/contents/approach-to-liver-disease-occurring-during-pregnancy?search=LIVER%20DISEASE&source=search_result&selectedTitle=5~150&usage_type=default&display_rank=5
Baseline form	Mild liver disease	categorical	Yes;No	No		Fatty liver, acute hepatitis ... IN HOSPITAL RECORDS	https://www.uptodate.com/contents/approach-to-liver-disease-occurring-during-pregnancy?search=LIVER%20DISEASE&source=search_result&selectedTitle=5~150&usage_type=default&display_rank=5
Baseline form	Thrombophilia	categorical	Yes;No	No		Factor V, Protrombina 20210A, Proteine C ,Proteine S, Antithrombin III , Other Clot factor.	https://www.uptodate.com/contents/inherited-thrombophilias-in-pregnancy?search=thrombophilias&source=search_result&selectedTitle=5~150&usage_type=default&display_rank=5
Baseline form	Síndrome antifosfolípido	categorical	Yes;No	No		Sapporo APS Classification Criteria.	https://www.uptodate.com/contents/diagnosis-of-antiphospholipid-syndrome?search=antiphospholipid&source=search_result&selectedTitle=1~150&usage_type=default&display_rank=1
Baseline form	Chronic hematologic disease	categorical	Yes;No	No		based on medical records
Baseline form	HIV	categorical	Yes;No	No		positive in diagnostic tests
Baseline form	Obesity (defined by medical standard)	categorical	Yes;No	No		Body mass index prior to pregnancy > 30. use first pregnancy visit as reference
Baseline form	Pregestational Diabetes with complications	categorical	Yes;No	No		high levels of glucose in blood, with kidney, vascular, eye complications	Https://www.uptodate.com/contents/pregestational-preexisting-and-gestational-diabetes-intrapartum-and-postpartum-glycemic-control?search=pREGESTATIONAL HIPWERTENSION%2B&source=search_result&selectedTitle=1~55&usage_type=default&display_rank=1
Baseline form	Pregestational Diabetes without complications	categorical	Yes;No	No		high levels of blood glucose	Https://www.uptodate.com/contents/pregestational-preexisting-and-gestational-diabetes-intrapartum-and-postpartum-glycemic-control?search=pREGESTATIONAL HIPWERTENSION%2B&source=search_result&selectedTitle=1~55&usage_type=default&display_rank=1
Baseline form	Rheumatologic disease	categorical	Yes;No	No		LUPUS, sclerosis, CREST syndrome, myopathies ...
Baseline form	Depression	categorical	Yes;No	No		Diagnosis of depression in a clinical file/report	https://www.nice.org.uk/guidance/conditions-and-diseases/fertility--pregnancy-and-childbirth/intrapartum-care
Baseline form	Drug addiction	categorical	Yes;No	No		oral, smoked (other than tobacco), intravenous drug abuse
Baseline form	Smoker	categorical	Yes;No;Ex-smoker	No
Baseline form	Pre-pregnancy hypertension	categorical	Yes;No	No		blood pressure > 149/90 BEFORE PREGNANCY	https://www.uptodate.com/contents/chronic-hypertension-in-pregnancy-management-and-outcome?search=hipertensi%C3%B3n%20pregestacional&source=search_result&selectedTitle=1~150&usage_type=default&display_rank=1
Baseline form	Other relevant risk factors	categorical	Yes;No	No
Baseline form	Specify other factors	text		No	1
Baseline form	Obstetric history before COVID diagnosis			No
Baseline form	Single gestation	categorical	Yes;No	No		one fetus
Baseline form	IVF (no egg donation)	categorical	Yes;No	No		in vitro fertilization without egg donation
Baseline form	IVF with egg donation	categorical	Yes;No	No		in vitro fertilization with egg donation (with donor eggs)
Baseline form	Insemination	categorical	Yes;No	No		assisted intrauterine insemination
Baseline form	Multiple Pregnancy	categorical	Yes;No	No		two or more fetuses
Baseline form	Gestational diabetes	categorical	Yes;No	No		LOCAL CRITERIA.	https://www.uptodate.com/contents/gestational-diabetes-mellitus-obstetric-issues-and-management?search=DIUABETES%20GESTA&source=search_result&selectedTitle=1~150&usage_type=default&display_rank=1
Baseline form	Gestational hypertension	categorical	Yes;No	No		ACOG CRITERIA. HIGH BLOOD PRESSURE > 140/90 > 20 weeks, .no organ involment	https://www.uptodate.com/contents/hypertensive-disorders-in-pregnancy-approach-to-differential-diagnosis?search=HIPERTENSIONEMBARAZO&source=search_result&selectedTitle=2~150&usage_type=default&display_rank=2
Baseline form	Threat of miscarriage	categorical	Yes;No	No		vaginal bleeding 1st trimester. FETAL HEART POSITIVE	https://www.uptodate.com/contents/overview-of-the-etiology-and-evaluation-of-vaginal-bleeding-in-pregnant-women?search=threatened%20abortion&source=search_result&selectedTitle=2~22&usage_type=default&display_rank=2#H10
Baseline form	Non-severe preeclampsia	categorical	Yes;No	No		MILD, MODERATE acog, rcog criteria
Baseline form	Severe preeclampsia No HELLP	categorical	Yes;No	No		ACOG CRITERIA.> 160/110, neuro, kidney, lung, criteria, HELLP	https://www.uptodate.com/contents/hypertensive-disorders-in-pregnancy-approach-to-differential-diagnosis?search=HIPERTENSIONEMBARAZO&source=search_result&selectedTitle=2~150&usage_type=default&display_rank=2
Baseline form	Positive preeclampsia screening	categorical	Yes;No	No		RCOG Clinical, FMF criteria	https://www.nice.org.uk/guidance/qs35/chapter/quality-statement-2-antenatal-assessment-of-pre-eclampsia-risk#what-the-quality-statement-means-for-service-providers-healthcare-practitioners-and-commissioners-2 (Accessed on March 30, 2018).
Baseline form	Third trimester intrauterine growth restriction (IUGR)	categorical	Yes; No	No		IUGR
Baseline form	Chromosomal abnormality screening	categorical	Yes;No	No		Positive screening for chromosomopathy according to local criteria
Baseline form	Anaemia (Hb <10 g/dL)	categorical	Yes;No	No		Anaemia (Hb <10 g/dL)
Baseline form	Thrombopenia (<100,000)	categorical	Yes;No	No		Platelets < 100x 10e3
Baseline form	Ultrasound diagnosis of malformation (1st trimester)	categorical	Yes;No	No		ULTRASOUND screening positive for MALFORMATION
Baseline form	Ultrasound diagnosis of malformation (week 20)	categorical	Yes;No	No		ULTRASOUND screening positive for MALFORMATION
Baseline form	GB Streptococcus carrier	categorical	Yes;No	No		positive in GB Strep test
Baseline form	Positive short neck screening	categorical	Yes;No	No		ultrasound based, Local criteria
Baseline form	ASA (acetylsalicylic acid) treatment	categorical	Yes;No	No		chronic treatment with ASA
Baseline form	Heparin treatment	categorical	Yes;No	No		chronic heparin treatment
Baseline form	Flu vaccinated	categorical	Yes;No	No		seasonal flu in this pregnancy
Baseline form	Pertussis vaccinated	categorical	Yes;No	No		pertussis vaccine in this pregnancy
Baseline form	Threat of premature labour	categorical	Yes;No	No		Tocolysis in this pregnancy
COVID-19 diagnosis form	Signs and symptoms on admission:			Yes
COVID-19 diagnosis form	Temperature (ºC)	quantitative	ºC with decimals	Yes		mother's body temperature
COVID-19 diagnosis form	Heart rate (beats per minute)	quantitative	beats per minute	Yes		Mother's heart rate
COVID-19 diagnosis form	Respiratory rate (breaths per minute)	quantitative	breaths per minute	Yes		Mother's respiratory rate
COVID-19 diagnosis form	Systolic pressure (mmHg)	quantitative	millimetres of mercury	Yes		Mother's systolic blood pressure
COVID-19 diagnosis form	Diastolic pressure (mmHg)	quantitative	millimetres of mercury	Yes		Diastolic blood pressure of the mother
COVID-19 diagnosis form	Oxygen saturation (%)	quantitative	oxyhaemoglobin percentage	No		Mother's oxygen saturation
COVID-19 diagnosis form	Measurement conditions	categorical	Room air;Oxygen therapy	No		conditions of the mother's oxygen saturation measurement
COVID-19 diagnosis form	Gestational age (weeks)	quantitative	weeks, rounded up	Yes		weeks of pregnancy
COVID-19 diagnosis form	Gestational age (days)	quantitative	days, rounded up	Yes		days of pregnancy
COVID-19 diagnosis form	Fundal height	categorical	Applicable;Not Applicable	No		Symphysis pubis distance. Uterine fundus	Royal College of Obstetricians and Gynaecologists
COVID-19 diagnosis form	Live foetus	categorical	Yes;No	No		live foetus at diagnosis
COVID-19 diagnosis form	Foetal heart rate (bpm)	quantitative	beats per minute	No		Foetal heart rate
COVID-19 diagnosis form	Cardiotocography upon admission	categorical	Normal;Abnormal;Non-reassuring	No		NORMAL, ABNORMAL. NON-REASSURING	Royal College of Obstetricians and Gynaecologists. NICE INTRAPARTUM CARE
COVID-19 diagnosis form	Specify	text		No	1		Royal College of Obstetricians and Gynaecologists. NICE INTRAPARTUM CARE
COVID-19 diagnosis form	Number of contractions (every 10 minutes)	quantitative	number of contractions every 10 minutes	No		Number of contractions at the time of diagnosis
COVID-19 diagnosis form	Vaginal bleeding	categorical	Yes;No	No		Any vaginal bleeding except menstrual bleeding	Royal College of Obstetricians and Gynaecologists
COVID-19 diagnosis form	Premature rupture of membranes	categorical	Yes;No	No		breaking of waters before labour begins	Royal College of Obstetricians and Gynaecologists
COVID-19 diagnosis form	Whole amniotic sac	categorical	Yes;No	No			Royal College of Obstetricians and Gynaecologists
COVID-19 diagnosis form	Liquid	categorical	Clear;Meconium	No			Royal College of Obstetricians and Gynaecologists
COVID-19 diagnosis form	Bishop Index	quantitative		No		cervix length, indication for labour induction or the probability of spontaneous preterm birth	Royal College of Obstetricians and Gynaecologists
COVID-19 diagnosis form	Initial chest X-ray:			No
COVID-19 diagnosis form	Initial chest x-ray	categorical	No chest x-ray;Normal;Infiltrates;Unilateral pneumonia;Bilateral pneumonia	No		chest x-ray results at time of diagnosis
COVID-19 diagnosis form	Signs and symptoms related to an episode of acute illness:			No
COVID-19 diagnosis form	Current or home fever	categorical	Yes;No	Yes		> 37.8ºC
COVID-19 diagnosis form	Cough	categorical	Yes;No	Yes		Cough (reported by the patient)
COVID-19 diagnosis form	Type of cough	categorical	Dry;Productive;Bloody sputum/haemoptysis	Yes	1	Type of cough (reported by the patient)
COVID-19 diagnosis form	Odynophagia	categorical	Yes;No	No		difficulty swallowing (reported by the patient)
COVID-19 diagnosis form	Rhinorrhoea/nasal congestion	categorical	Yes;No	No		Runny nose/nasal congestion (reported by patient)
COVID-19 diagnosis form	Earache	categorical	Yes;No	No		Earache (reported by patient)
COVID-19 diagnosis form	Anosmia	categorical	Yes;No	No		Loss of smell (reported by the patient)
COVID-19 diagnosis form	Wheezing	categorical	Yes;No	No		Wheezing (reported by doctor)
COVID-19 diagnosis form	Chest pain	categorical	Yes;No	No		Chest pain (reported by the patient)
COVID-19 diagnosis form	Muscle pain	categorical	Yes;No	No		Muscle aches (reported by the patient)
COVID-19 diagnosis form	Arthralgia	categorical	Yes;No	No		Joint pain (reported by the patient)
COVID-19 diagnosis form	General fatigue/malaise	categorical	Yes;No	No		General fatigue/malaise (reported by patient)
COVID-19 diagnosis form	Dyspnoea	categorical	Yes;No	No		Breathing difficulty (reported by the patient)
COVID-19 diagnosis form	Chest indrawing	categorical	Yes;No	No		Chest indrawing (reported by doctor)
COVID-19 diagnosis form	Headache	categorical	Yes;No	No		Headache (reported by the patient)
COVID-19 diagnosis form	Altered consciousness	categorical	Yes;No	No		Altered consciousness (reported by doctor)
COVID-19 diagnosis form	Seizures	categorical	Yes;No	No		Seizures (reported by the patient)
COVID-19 diagnosis form	Abdominal pain	categorical	Yes;No	No		Abdominal pain (reported by the patient)
COVID-19 diagnosis form	Nausea/Vomiting	categorical	Yes;No	No		Nausea/Vomiting (reported by patient)
COVID-19 diagnosis form	Diarrhoea	categorical	Yes;No	No		Diarrhoea (reported by the patient)
COVID-19 diagnosis form	Conjunctivitis	categorical	Yes;No	No		Conjunctivitis (reported by the doctor
COVID-19 diagnosis form	Acne	categorical	Yes;No	No		Skin rash (reported by the patient)
COVID-19 diagnosis form	Ulcerations	categorical	Yes;No	No		Ulcerations (reported by doctor)
COVID-19 diagnosis form	Lymphadenopathy	categorical	Yes;No	No		Lymphadenopathy according to physical examination
COVID-19 diagnosis form	Bleeding (haemorrhage)	categorical	Yes;No	No		Bleeding (reported by the patient)
COVID-19 diagnosis form	Specify bleeding (haemorrhage)	text		No	1	Type of bleeding (reported by the doctor)
COVID-19 diagnosis form	Microbiological samples:			No
COVID-19 diagnosis form	Was sample collection carried out during this episode?	categorical	Yes;No	Yes		Microbiological sample collection
COVID-19 diagnosis form	Influenza	categorical	Yes, confirmed;Yes, probable;No	No	1	Influenza result
COVID-19 diagnosis form	Specify influenza	categorical	A/H3N2;A/H1N1Ppdm09;A/H7N9;A/H5N1;A, unspecified;B;Other	Yes	2	Influenza subtype
COVID-19 diagnosis form	Specify another type of influenza	text		Yes	3	Influenza subtype different from the previous ones
COVID-19 diagnosis form	Coronavirus CoV-2	categorical	Yes, confirmed;No	Yes	1	COVID-19 result
COVID-19 diagnosis form	RSV	categorical	Yes, confirmed;Yes, probable;No	Yes	1	Respiratory syncytial virus result
COVID-19 diagnosis form	Adenovirus	categorical	Yes, confirmed;Yes, probable;No	Yes	1	Adenovirus result
COVID-19 diagnosis form	Bacterial	categorical	Yes, confirmed;No	Yes	1	Bacterial infection result
COVID-19 diagnosis form	Specify bacterial sample	text		No	2	Type of sample for diagnosis of bacterial infection
COVID-19 diagnosis form	Diagnosis of other respiratory infections	categorical	Yes, confirmed;Yes, probable;No	Yes		Diagnosis of other respiratory infections
COVID-19 diagnosis form	Specify other respiratory infections	text		Yes	2	Specify other respiratory infections
COVID-19 diagnosis form	Pneumonia signs and symptoms	categorical	Yes;No	Yes		Signs and symptoms consistent with pneumonia
COVID-19 diagnosis form	Microbiological sample:			Yes
COVID-19 diagnosis form	Sampling date	categorical		No		Date of sample collection for microbiological analysis
COVID-19 diagnosis form	Type of sample	categorical	Nasal/nasopharyngeal;Pharynx;Combined nasal/NP+pharynx;Sputum;Bronchoalveolar lavage;Endotracheal aspirate;Urine;Stool/rectum;Blood;Other	No		Type of sample for microbiological analysis
COVID-19 diagnosis form	Specify another type of sample	text		No	1	Sample type different from the previous ones
COVID-19 diagnosis form	Lab test	categorical	PCR;Culture;Other	No		Diagnostic test used
COVID-19 diagnosis form	Specify another lab test	text		No	1	Diagnostic test used different from the previous ones
COVID-19 diagnosis form	Result	categorical	Positive;Negative;Does not apply	No		Result of the diagnostic test
COVID-19 diagnosis form	Pathogen detected	text		No		Pathogen detected
COVID-19 diagnosis form	Asymptomatic SARS-CoV 2 screening:			No		ongoing screening programs
COVID-19 diagnosis form	Asymptomatic SARS-CoV 2 screening	categorical	Yes;No	Yes		asymptomatic patient that underwent screening test for COVID-19
COVID-19 diagnosis form	Asymptomatic SARS-CoV 2 screening time	categorical	Antepartum;Intrapartum;Postpartum (still admitted)	Yes	1	Asymptomatic SARS-CoV 2 screening time
Delivery form	Delivery/postpartum disease data:			No
Delivery form	Delivery date	categorical		Yes		Delivery date
Delivery form	Gestational age (weeks)	quantitative	weeks, rounded up	Yes
Delivery form	Gestational age (days)	quantitative	days, rounded up	Yes
Delivery form	Patient referred from:	categorical	Obstetric emergencies;COVID hospitalization ward;ICU;Other	Yes		hospital department prior to delivery room admission
Delivery form	Specify another source	text		No	1	another origin different from the previous ones
Delivery form	Mother's signs and symptoms at time of labour admission	categorical	COVID Asymptomatic;Mild symptoms;Mild-moderate pneumonia;Severe pneumonia;Sepsis;Septic shock;Other	No		symptoms related to COVID experienced by the mother upon admission to labour	WHO. Clinical Management of COVID-19. Interim Guidance 27 May 2020. Geneva;2020. WHO/2019-nCoV/clinical/2020.5. Available from: https://www.who.int/publications/i/item/clinical-management-of-covid-19
Delivery form	Specify other	text		No	1	symptoms other than the above
Delivery form	Symptoms	categorical	Fever > 37.8 °;Fever 39 °;Cough;Sore throat;Dyspnoea;Myalgia;Diarrhea;Vomiting;Altered consciousness;General malaise;Others	No		specify mild symptoms	WHO. Clinical Management of COVID-19. Interim Guidance 27 May 2020. Geneva;2020. WHO/2019-nCoV/clinical/2020.5. Available from: https://www.who.int/publications/i/item/clinical-management-of-covid-19
Delivery form	Specify other symptoms	text		No	1	other mild symptoms different from the above
Delivery form	Heart rate (bpm)	quantitative	beats per minute	No		Mother's heart rate
Delivery form	Respiratory rate (bpm)	quantitative	breaths per minute	No		Mother's respiratory rate
Delivery form	Oxygen saturation (%)	quantitative	oxyhaemoglobin percentage	No		Mother's oxygen saturation with room air
Delivery form	Systolic pressure before delivery (mmHg)	quantitative	millimetres of mercury	No		Systolic blood pressure of the mother before delivery
Delivery form	Diastolic pressure before delivery (mmHg)	quantitative	millimetres of mercury	No		Diastolic blood pressure of the mother before delivery
Delivery form	Birth data:			No
Delivery form	Start of labour	categorical	Spontaneous;Induced	No		How was the start of labour?
Delivery form	Causes of induction	categorical	Mother COVID disease;Premature rupture of membranes;Non-reassuring registry;Preeclampsia;Prolonged pregnancy;Gestational diabetes;IUGR;Macrosome;Elective by organization	No	1	Causes of induction
Delivery form	PRM management	categorical	Immediate induction;watchful waiting management	No	2	Management of Premature Rupture of Membranes	https://www.rcog.org.uk/en/guidelines-research-services/guidelines/gtg73/
Delivery form	Induction means	categorical	Prostaglandins (Props);Prostaglandins (Misofar);Oxytocin;Cook balloon;Foley catheter;Other	No	1	Induction means
Delivery form	Specify other means of induction	text		No	2	Other means of induction different from the previous ones
Delivery form	Type of delivery	categorical	Eutocico;Instrumental;Cesarean	No		Type of delivery (vaginal without use of instruments, vaginal with use of instruments, caesarean section)	https://www.rcog.org.uk/en/guidelines-research-services/guidelines/gtg26/
Delivery form	Indication of caesarean section	categorical	Risk of loss of foetal well-being;No progression of labor;Cephalopelvic disproportion (reached completeness);Buttocks;Maternal pathology related to COVID;Maternal pathology not related to COVID;Previous caesarean section;Previous myomectomy;Cord prolapse;Pathological intrapartum pH;Other	No	1	Why was caesarean section carried out
Delivery form	Specify another indication	text	ROBSON	No	2	Another reason for caesarean section different from the above	Society of Obstetricians and Gynaecologists of Canada (SOGC): Committee opinion on the classification of Caesarean sections in Canada – The modified Robson criteria (2012)
Delivery form	Instrumental delivery type	categorical	Vacum;Forceps;Spatulas	No	1	Instruments used in dystocic delivery
Delivery form	Indication of instrumental delivery	categorical	COVID19 Pathology-Related Expulsive Stage Relief;Non-COVID19 related Expulsive Stage Relief;Rotational Dystocia;Prolonged Expulsive Stage;Maternal non-collaboration;Risk of Foetal Well-Being Loss;Other	No	1	Why was instrumental used?
Delivery form	Specify another indication for instrumental delivery	text		No	2	Another reason for using instruments different from the previous ones
Delivery form	Antepartum rupture of membranes	categorical	Yes;No	No		Did the waters break?	https://www.rcog.org.uk/en/guidelines-research-services/guidelines/gtg73/
Delivery form	Total hours of broken sac	quantitative	hours	No	1	Time elapsed between breaking waters and delivery	https://www.rcog.org.uk/en/guidelines-research-services/guidelines/gtg73/
Delivery form	Intrapartum antibiotics	categorical	Yes;No	No		Antibiotics are given to the mother during labour
Delivery form	Type of intrapartum antibiotics	categorical	Penicillin;Ampicillin;Gemtamycin;Ceftriaxone;Clindamycin;Azithromycin;Other	No	1	What antibiotics are given?
Delivery form	Specify another antibiotic	text		No	2	Another antibiotic used different from the previous ones
Delivery form	Anaesthesia	categorical	Yes;No	No		Anaesthesia was used
Delivery form	Type of anaesthesia	categorical	Epidural;Spinal (spinal);Combined;General;Other	No	1	Type of anaesthesia administered
Delivery form	Specify another type of anaesthesia	text		No	2	Another type of anaesthesia administered different from the previous ones
Delivery form	Ante or post-partum hypertension (> 140/90)	categorical	Yes;No	No		Maternal blood pressure> 140/90 before or after delivery
Delivery form	Preeclampsia	categorical	No;Moderate (<160/110);Severe (> 160/110) or affects lung, oligoanuria, brain;HELLP	No		A condition that occurs in the second half of pregnancy, associated with high blood pressure and protein in the urine (HELLP: A combined liver and blood clotting disorder which is a complication of pre-eclampsia)	Royal College of Obstetricians and Gynaecologists
Delivery form	Postpartum haemorrhage	categorical	No;PPH medical treatment;PPH conservative surgical treatment;Obstetric hysterectomy	No		Heavy blood loss after the delivery of the baby, need of treatment, <1000 ml, Hypotension	Royal College of Obstetricians and Gynaecologists.ACOG -https://www.rcog.org.uk/en/guidelines-research-services/guidelines/gtg52/
Delivery form	Postpartum thromboembolic risk without COVID19 comorbidity	categorical	Low;Intermediate;High	Yes			RCOG 2015. GREEN 37A 37 B https://www.rcog.org.uk/en/guidelines-research-services/guidelines/gtg37a/
Delivery form	Additional comments	text		No		Other complications
Delivery form	Treatment in childbirth and immediate postpartum:			No
Delivery form	Treatment	categorical	None;Therapeutic corticosteroids;Hydroxy chloroquine;Heparin;Lopinavir/ritonavir (LPV/R);Darunavir/ritonavir;Remdesivir (GS-5734);Interferon;Paracetamol;Other	Yes		Treatment against COVID administered to the mother during delivery and/or the immediate postpartum	WHO. Clinical Management of COVID-19. Interim Guidance 27 May 2020. Geneva;2020. WHO/2019-nCoV/clinical/2020.5. Available from: https://www.who.int/publications/i/item/clinical-management-of-covid-19
Delivery form	Specify another treatment	text		Yes	1	Another treatment against COVID different from the previous ones
Delivery form	Heparin dose	categorical	Heparin prophylactic doses;Heparin intermediate doses (Example: Enoxaparin mg/kg/day);Heparin anticoagulant doses	No		What dose of heparin is given to the mother?
Delivery form	Heparin duration	categorical	<10 days;10-15 days;15 days-6 weeks	No		Duration of mother's heparin treatment
Delivery form	Oxygen therapy	categorical	Room air;Nasal prongs;HFNC High flow nasal canula;CPAP or NIV;Intubation;ECMO;Other	No		Type of oxygen therapy in the mother (room air= no need for oxygen therapy)
Delivery form	Specify another oxygen therapy	text		No	1	Another oxygen therapy different from the previous ones
Basic new-born form	New-born data:			Yes
Basic new-born form	It is important to be as precise as possible in the assessment of neonatal damage and not fill in this questionnaire until we have an idea of the new-born's progression before discharge. This form must be closed upon discharge of the new-born.			No
Basic new-born form	Live foetus	categorical	Yes;No	Yes		Live foetus at the time of delivery. OFF> 0 PER MINUTE
Basic new-born form	Sex	categorical	Male;Female;Not determined	No		New-born sex
Basic new-born form	Weight (grams)	quantitative	grams	Yes		New-born weight
Basic new-born form	APGAR 1	quantitative	0 to 10	Yes		New-born viability score, based on muscle tone, respiratory effort, heart rate, reflexes, and skin color;assessment in the first minute of life	Royal College of Obstetricians and Gynaecologists
Basic new-born form	APGAR 5	quantitative	0 to 10	Yes		New-born viability score, based on muscle tone, respiratory effort, heart rate, reflexes, and skin color;assessment 5 minutes after delivery	Royal College of Obstetricians and Gynaecologists
Basic new-born form	Other new-born data:			No
Basic new-born form	Arterial pH	quantitative	units with decimals	Yes		pH in umbilical arterial blood
Basic new-born form	Neonatal resuscitation	categorical	0;1;2;3;4	No		Resuscitation or to IV Spanish Society of Neonatology	Royal College of Obstetricians and Gynaecologists https://www.nice.org.uk/guidance/conditions-and-diseases/fertility--pregnancy-and-childbirth/intrapartum-care
Basic new-born form	Cord clamping	categorical	<30 seconds after delivery (early);> 30 seconds after delivery	No		cutting of the umbilical cord: <30 seconds after birth = early;> 30 seconds after birth = delayed	Royal College of Obstetricians and Gynaecologists https://www.nice.org.uk/guidance/conditions-and-diseases/fertility--pregnancy-and-childbirth/intrapartum-care
Basic new-born form	Early clamping	categorical	For COVID;For neonatal resuscitation;Other	No	1	Reasons for early clamping (<30 seconds after birth)	Royal College of Obstetricians and Gynaecologists https://www.nice.org.uk/guidance/conditions-and-diseases/fertility--pregnancy-and-childbirth/intrapartum-care
Basic new-born form	Specify another cause of early clamping	text		No	2	Another reason for early clamping different from the previous ones
Basic new-born form	Delayed clamping	categorical	Premature;Protocol despite COVID;Other	No	1	Delayed Clamping Cause (> 30 seconds after birth)	Royal College of Obstetricians and Gynaecologists
Basic new-born form	Specify another cause of delayed clamping	text		No	2	Another reason for delayed clamping different from the previous ones
Basic new-born form	Skin-to-skin in the first 24 hours after delivery	categorical	Yes;No	No		Mother-new-born skin-to-skin contact in the first 24 hours after delivery
Basic new-born form	Postpartum new-born-mother interaction > 2h after delivery	categorical	Yes, same room;Yes, different room;No contact	No		Mother and new-born interaction for more than 2 hours after delivery
Basic new-born form	Hours of contact of the new-born with the mother before diagnosis of the case	quantitative	hours with decimals	No		Hours of contact between the new-born and the mother before she was diagnosed with COVID-19
Basic new-born form	For COVID diagnoses in the postpartum:			No
Basic new-born form	Admission to the NICU	categorical	Yes;No	Yes		Admission of the new-born to the neonatal intensive care unit (NICU)
Basic new-born form	Reason for admission	text		Yes	1	Reason for admission of the new-born to the NICU
Basic new-born form	Days of admission to the NICU	quantitative		Yes	1	Days of new-born admission to the NICU
Basic new-born form	COVID test <12 hours	categorical	Yes;No	Yes		COVID PCR in the new-born in the first 12 hours after delivery
Basic new-born form	COVID test result <12 hours	categorical	Positive;Negative	Yes	1	New-born COVID PCR result in the first 12 hours after delivery
Basic new-born form	COVID test 12-48 hours	categorical	Yes;No	Yes		COVID PCR in the new-born during the first 12 to 48 hours after delivery
Basic new-born form	COVID test result 12-48 hours	categorical	Positive;Negative	Yes	1	New-born COVID PCR result during the first 12 to 48 hours after delivery
Basic new-born form	COVID test repeat	categorical	7 days;Not repeated;Other	Yes		Repeat COVID PCR to the new-born after the previous tests
Basic new-born form	Clinical evaluation at 14 days	categorical	Asymptomatic;COVID symptoms	Yes		Clinical evaluation of the new-born, symptoms compatible with COVID-19
Basic new-born form	Readmission for COVID before 14 days	categorical	Yes;No	Yes		New-born readmission due to COVID during the first 14 days after delivery
Basic new-born form	Breastfeeding:			No
Basic new-born form	Breastfeeding after delivery	categorical	Yes;No	No		Breastfeeding after delivery
Basic new-born form	Days of separation	quantitative	days, rounded up	No	1	Days between birth and new-born-mother interaction
Basic new-born form	Breastmilk	categorical	Direct breastfeeding mother;Expressed breast milk;Milk bank	No		Breastmilk
Basic new-born form	Breast milk extracted/bank of:	categorical	Mother;Person not infected	No		Milk origin
Basic new-born form	Mother's protection	categorical	Mother mask;Cleaning;Others	No		Means of protection of the mother given the epidemiological situation
Basic new-born form	Specify other means of mother protection	text		No	1	Other protection measures different from the above
End Form	Has follow-up ended?	categorical	Yes;No	Yes		Patient's six-week follow-up has ended
End Form	Reason for termination	categorical	Delivery > 23 weeks;Miscarriage/immature delivery <23 weeks;Loss of the case;Mother's death	Yes	1	Reason for ending patient follow-up
End Form	Completion date	categorical		Yes	1	Completion date
End Form	Complications:			No
End Form	Viral pneumonia	categorical	Yes;No	No		Pneumonia due to viral infection in the mother
End Form	Bacterial pneumonia	categorical	Yes;No	No		Pneumonia due to bacterial infection in the mother
End Form	Acute respiratory distress syndrome	categorical	Yes;No	No		Silverman Scale	Neonatology 2019;115:432–450 https://www.msdmanuals.com/professional/pediatrics/respiratory-problems-in-neonates/respiratory-distress-syndrome-in-neonates
End Form	Specify severity respiratory distress syndrome	categorical	Mild;Moderate;Severe;Unknown	No	2	Local Criteria	https://doi.org/10.1159/000499361
End Form	Cardiac arrest	categorical	Yes;No	No		Due to myocardial infarction, heart valve disease, cardiogenic shock, arrhythmias
End Form	Bacteraemia	categorical	Yes;No	No		Pathogenic bacteria in blood.Positive blood cultures	https://www.rcog.org.uk/en/guidelines-research-services/guidelines/gtg64a/
End Form	Coagulopathy/ Disseminated Intravascular Coagulation	categorical	Yes;No	No		Coagulopathy/Disseminated Intravascular Coagulation
End Form	Pneumothorax	categorical	Yes;No	No		Atelectasis
End Form	Rhabdomyolysis/Myositis	categorical	Yes;No	No		Rhabdomyolysis/Myositis
End Form	Pleural effusion	categorical	Yes;No	No		Pleural effusion
End Form	Bronchiolitis obliterans-organizing pneumonia	categorical	Yes;No	No
End Form	Bronchiolitis	categorical	Yes;No	No		pulmonary infection, generally due to Respiratory Syncytial Virus,
End Form	Meningitis/Encephalitis	categorical	Yes;No	No		inflammation of the meninges/brain, new-born
End Form	Seizures (not eclampsia)	categorical	Yes;No	No		Seizures (not due to eclampsia)
End Form	Cerebrovascular accident (Stroke)	categorical	Yes;No	No		stroke, cerebral infarction, brain haemorrhage, cerebrovascular accident, cerebrovascular attack
End Form	Congestive heart failure	categorical	Yes;No	No		Congestive heart failure
End Form	Endocarditis/Myocarditis/Pericarditis	categorical	Yes;No	No		Endocardium, myocardium, pericardium infection
End Form	Arrhythmia	categorical	Yes;No	No		Diagnostic criteria. Spanish Society Cardiology
End Form	Ischemic heart disease	categorical	Yes;No	No		due to arteriosclerosis
End Form	Endometritis	categorical	Yes;No	No		postpartum endometritis, uterine bacterial infection
End Form	Mastitis	categorical	Yes;No	No		Puerperal mastitis, inflammation of the mammary gland due to bacterial infection
End Form	Deep venous thrombosis	categorical	Yes;No	No		A blood clot that forms in a deep vein	Royal College of Obstetricians and Gynaecologists
End Form	Pulmonary embolism	categorical	Yes;No	No		DIAGNOSED by imaging techniques	Royal College of Obstetricians and Gynaecologists
End Form	Postpartum haemorrhage (> 1000ml)	categorical	Yes;No	No		Heavy bleeding (loss > 1000ml) immediately after birth	Royal College of Obstetricians and Gynaecologists
End Form	Transfusion	categorical	Yes;No	No		packed red blood cells or whole blood	Royal College of Obstetricians and Gynaecologists
End Form	Markers of foetal infection	categorical	Yes;No	No			ISUOG
End Form	Foetal malformation	categorical	Yes;No	No			ISUOG
End Form	Postpartum depression	categorical	Yes;No	No		Edinburgh Postnatal Depression Scale and Postpartum Depression Screening Scale on admission or before	https://www.uptodate.com/contents/postpartum-unipolar-major-depression-epidemiology-clinical-features-assessment-and-diagnosis?search=POSTPARTUM%20DEPRESSION&source=search_result&selectedTitle=1~121&usage_type=default&display_rank=1
End Form	Anaemia	categorical	Yes;No	No		Haemoglobin <10 g/dL	Royal College of Obstetricians and Gynaecologists
End Form	Rhabdomyolysis/Myositis	categorical	Yes;No	No		Rhabdomyolysis/Myositis	https://www.rcog.org.uk/en/guidelines-research-services/guidelines/gtg47/
End Form	Acute kidney injury/Acute kidney failure	categorical	Yes;No	No		Acute kidney injury/Acute kidney failure
End Form	Gastrointestinal bleeding	categorical	Yes;No	No		Gastrointestinal bleeding
End Form	Acute kidney injury/Acute kidney failure	categorical	Yes;No	No		Acute kidney injury/Acute kidney failure
End Form	Pancreatitis	categorical	Yes;No	No		Inflammation of the pancreas from different causes
End Form	Liver dysfunction	categorical	Yes;No	No		mild hepatic dysfunction but not liver failure criteria
End Form	Hyperglycaemia	categorical	Yes;No	No		glucose> 180 mg/dl	Royal College of Obstetricians and Gynaecologists
End Form	Hypoglycaemia	categorical	Yes;No	No		glucose <70 mg/dl	Royal College of Obstetricians and Gynaecologists
End Form	Other non-obstetric complications	categorical	Yes;No	No		Other non-obstetric complications different from the above
End Form	Specify other non-obstetric complications	text		No	1	Specify other non-obstetric complications different from the above
End Form	Obstetric complications:			No
End Form	Endometritis	categorical	Yes;No	No		Inflammation of the lining of the womb, causing discomfort or pain	https://www.uptodate.com/contents/postpartum-endometritis?search=POSTPARTUM%20FEVER&source=search_result&selectedTitle=1~28&usage_type=default&display_rank=1
End Form	Intrapartum or postpartum fever without obstetric origin	categorical	Yes;No	No		> 37.8ºC	https://www.uptodate.com/contents/intrapartum-fever?search=CHORIOAMNIONITIS&source=search_result&selectedTitle=2~150&usage_type=default&display_rank=2
End Form	Chorioamnionitis	categorical	Yes;No	No		An infection inside the uterus affecting the membranes (called the chorion and amnion) which surround the amniotic fluid	Royal College of Obstetricians and Gynaecologists
End Form	Deep venous thrombosis	categorical	Yes;No	No		A blood clot that forms in a deep vein	Royal College of Obstetricians and Gynaecologists
End Form	Pulmonary embolism	categorical	Yes;No	No		Part of a blood clot (DVT) which breaks off and travels in the blood stream and becomes stuck in the lung	ttps://www.uptodate.com/contents/pulmonary-embolism-in-pregnancy-epidemiology-pathogenesis-and-diagnosis?search=PULMONARY EMBOLISM%20 PREGNANT&source=search_result&selectedTitle=1~150&usage_type=default&display_rank=1
End Form	Postpartum haemorrhage (> 1000ml)	categorical	Yes;No	No		Heavy bleeding immediately after birth	Royal College of Obstetricians and Gynaecologists
End Form	Transfusion	categorical	Yes;No	No		packed red blood cells or whole blood	Royal College of Obstetricians and Gynaecologists
End Form	Markers of foetal infection	categorical	Yes;No	No			Royal College of Obstetricians and Gynaecologists
End Form	Foetal malformation	categorical	Yes;No	No			Royal College of Obstetricians and Gynaecologists
End Form	Third trimester foetal growth defect (SGA)	categorical	Yes;No	No		Estimated foetal weight below the 10th percentile and above the 3rd percentile for gestational age with a normal Doppler study	Royal College of Obstetricians and Gynaecologists
End Form	Third trimester foetal growth defect (IUGR)	categorical	Yes;No	No		Estimated foetal weight (EFW) less than the 3rd percentile or EFW less than the 10th percentile with impaired cerebral-umbilical or uterine arteries flow	https://www.nice.org.uk/guidance/cg107
End Form	Non-severe preeclampsia	categorical	Yes;No	No		SBP <160 DBP <110. WITHOUT RENAL, HEPATIC, CEREBRAL, PULMONARY symptoms, NON-THROMBOPENIA. NO OLIGOANURIA NO ECLAMPSIA NO HELLP	https://www.nice.org.uk/guidance/cg107
End Form	Severe preeclampsia No HELLP	categorical	Yes;No	No		When pre-eclampsia has progressed SBP> 160 OR DBP> 110. RENAL, HEPATIC, CEREBRAL ABNORMALITIES, LUNG. HEADACHE, THROMBOPENIA. OLIGOANURIA ECLAMPSIA OR HELLP	https://www.nice.org.uk/guidance/cg107
End Form	HELLP	categorical	Yes;No	No		Combined liver and blood clotting disorder which is a complication of pre-eclampsia-LDL > 600 U AST GOT > 75 platelets <100,000	https://www.nice.org.uk/guidance/cg107
End Form	Eclampsia	categorical	Yes;No	No		Seizures/fits that are a potentially life-threatening complication of pre-eclampsia	Royal College of Obstetricians and Gynaecologists
End Form	Abruptio placentae	categorical	Yes;No	No		Premature detachment of a normally placed placenta	https://www.uptodate.com/contents/placental-abruption-pathophysiology-clinical-features-diagnosis-and-consequences
End Form	Dead foetus in utero	categorical	Yes;No	No		Dead foetus before delivery	https://www.uptodate.com/contents/stillbirth-incidence-risk-factors-etiology-and-prevention?search=STILLBIRTH&source=search_result&selectedTitle=1~150&usage_type=default&display_rank=1
End Form	Postpartum depression	categorical	Yes;No	No		Edinburgh Postnatal Depression Scale and Postpartum Depression Screening Scale. THROUGHOUT THE PROCESS	https://www.uptodate.com/contents/postpartum-unipolar-major-depression-epidemiology-clinical-features-assessment-and-diagnosis?search=POSTPARTUM%20DEPRESSION&source=search_result&selectedTitle=1~121&usage_type=default&display_rank=1
End Form	Other obstetric complications	categorical	Yes;No	No		Other obstetric complications different from the above
End Form	Specify other obstetric complications	text		No	1	Define other obstetric complications different from the above
End Form	Case observations	text		No
